# Supplementary material
Source: bioRxiv or medRxiv preprint supplement (https://www.biorxiv.org/highwire/filestream/125742/field_highwire_adjunct_files/1/285585-2.pdf)

# Supplementary Figures

Figure S1. Registration QC: Mean and standard deviation of anatomical and mean functional images

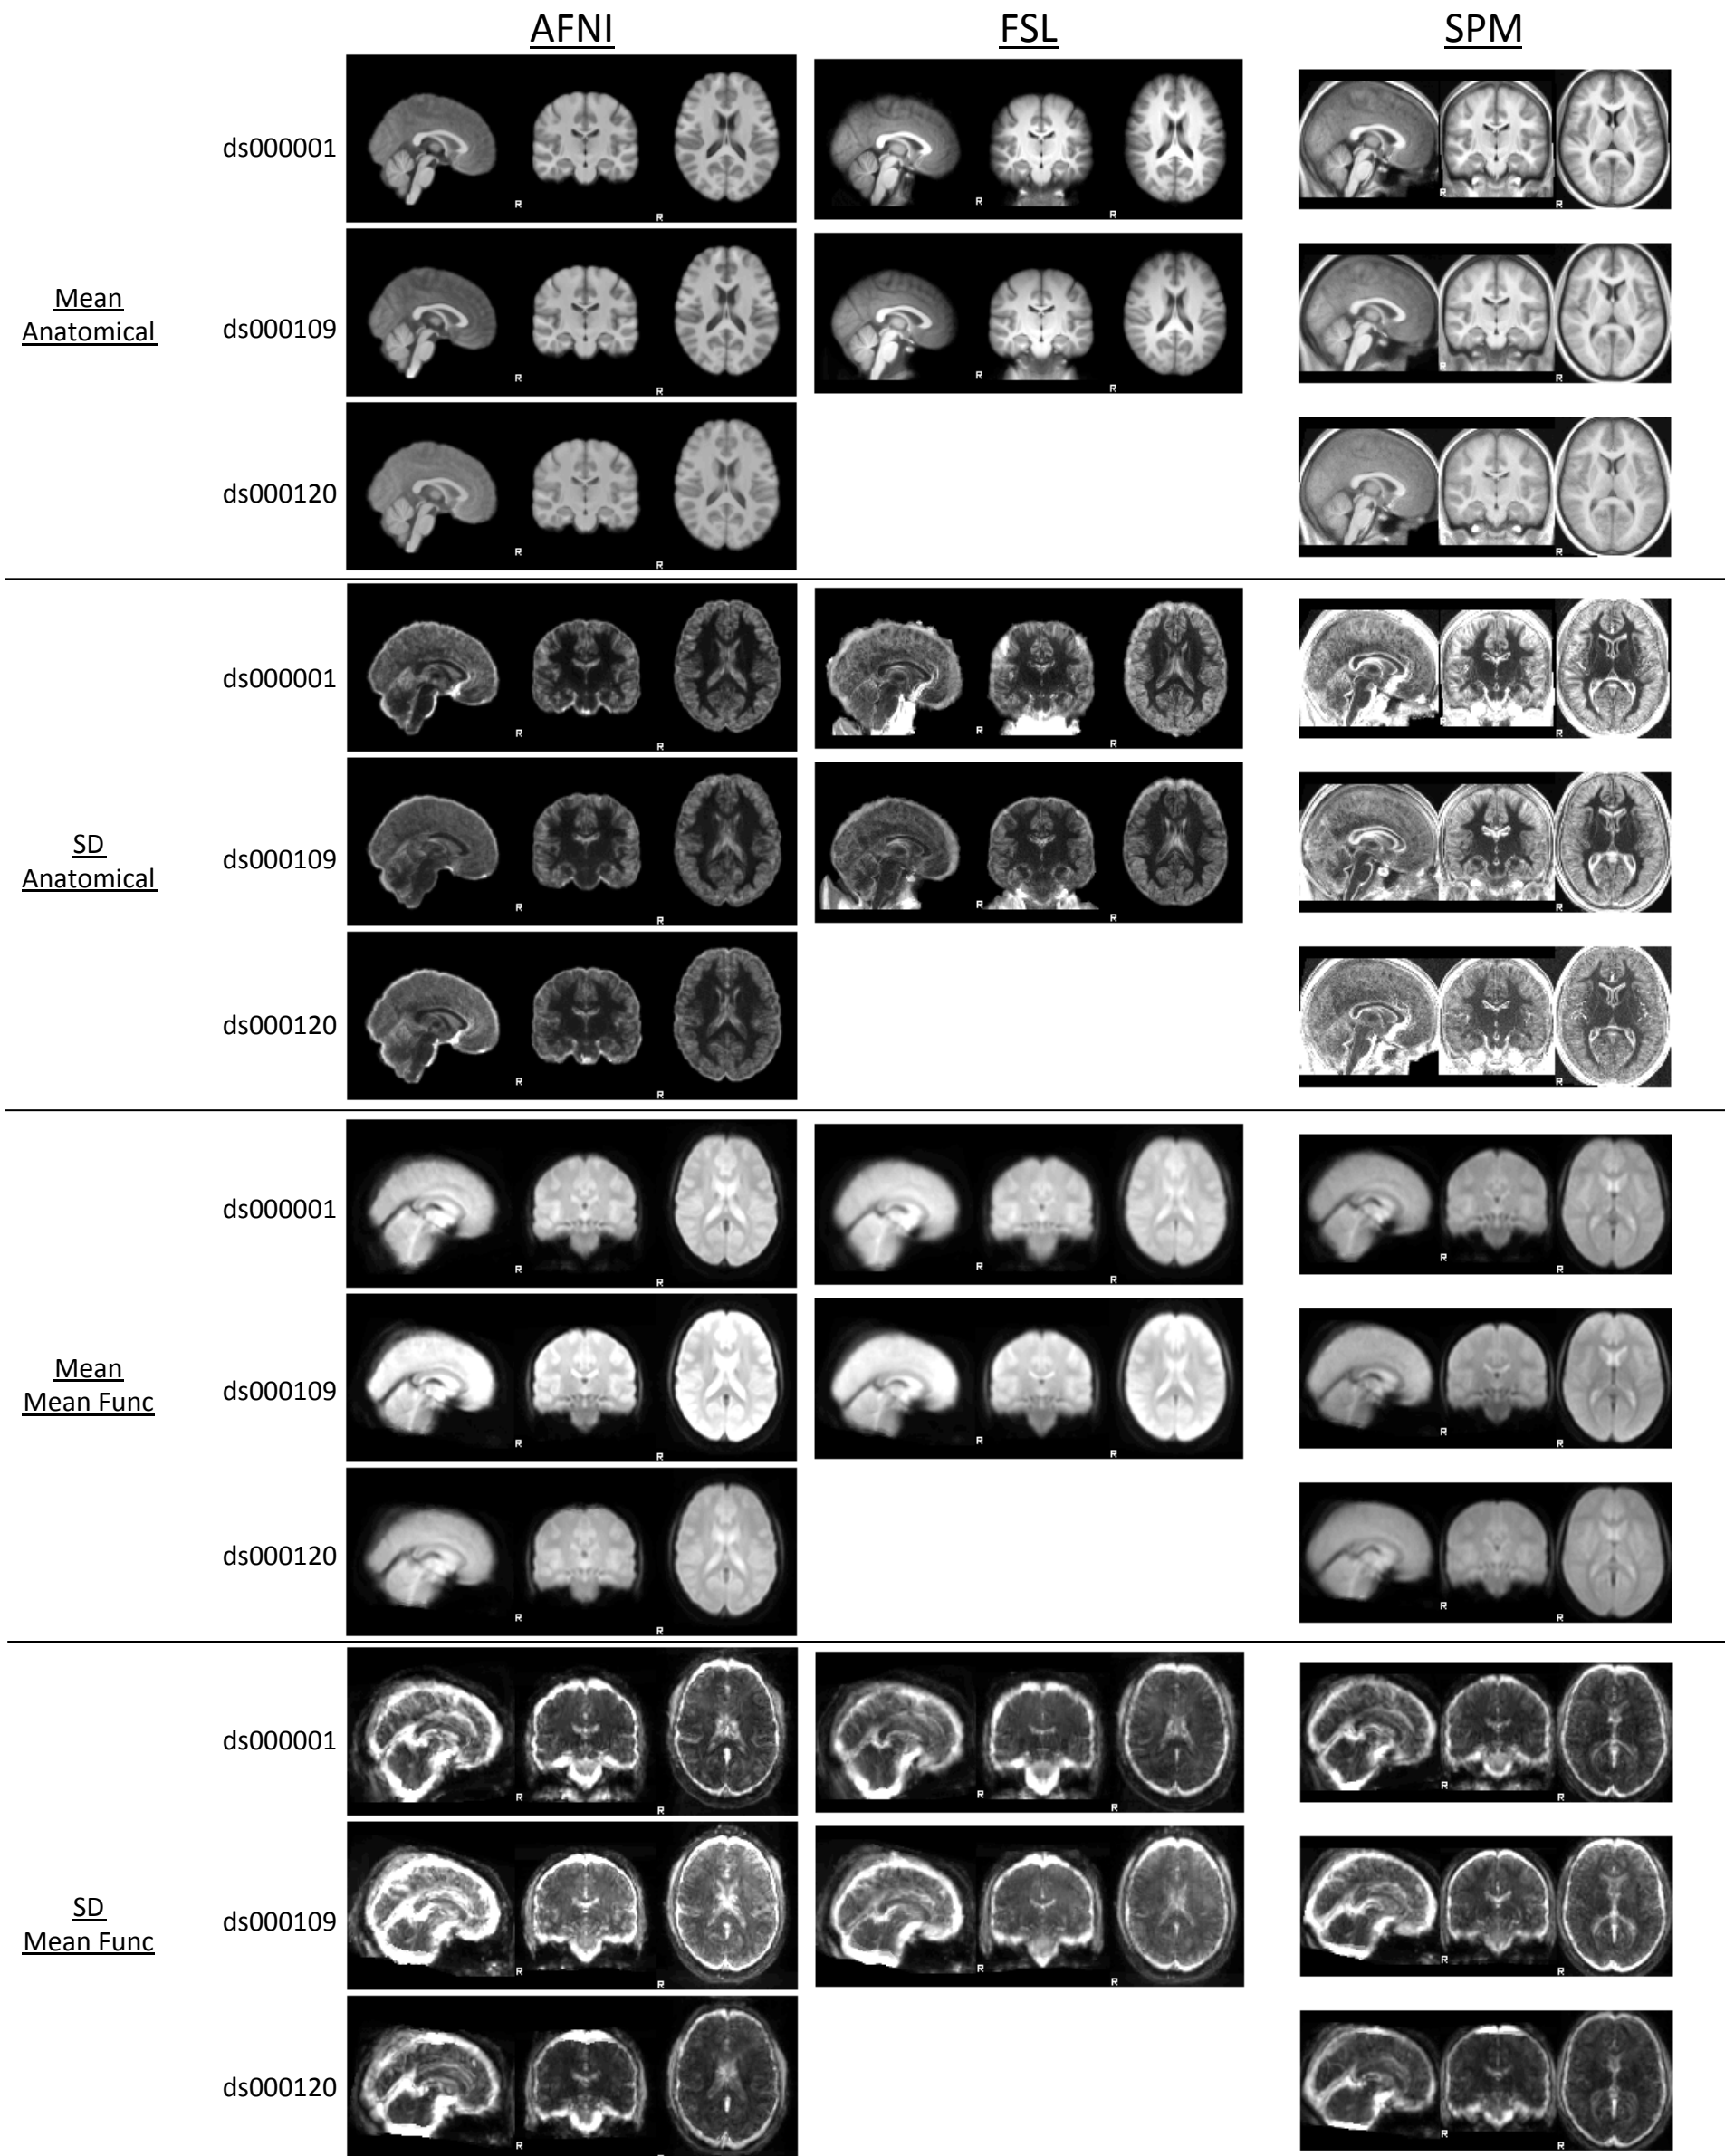

Figure S2. ds000001 Inter-Software Comparison, 5% FWE Clusterwise Inference

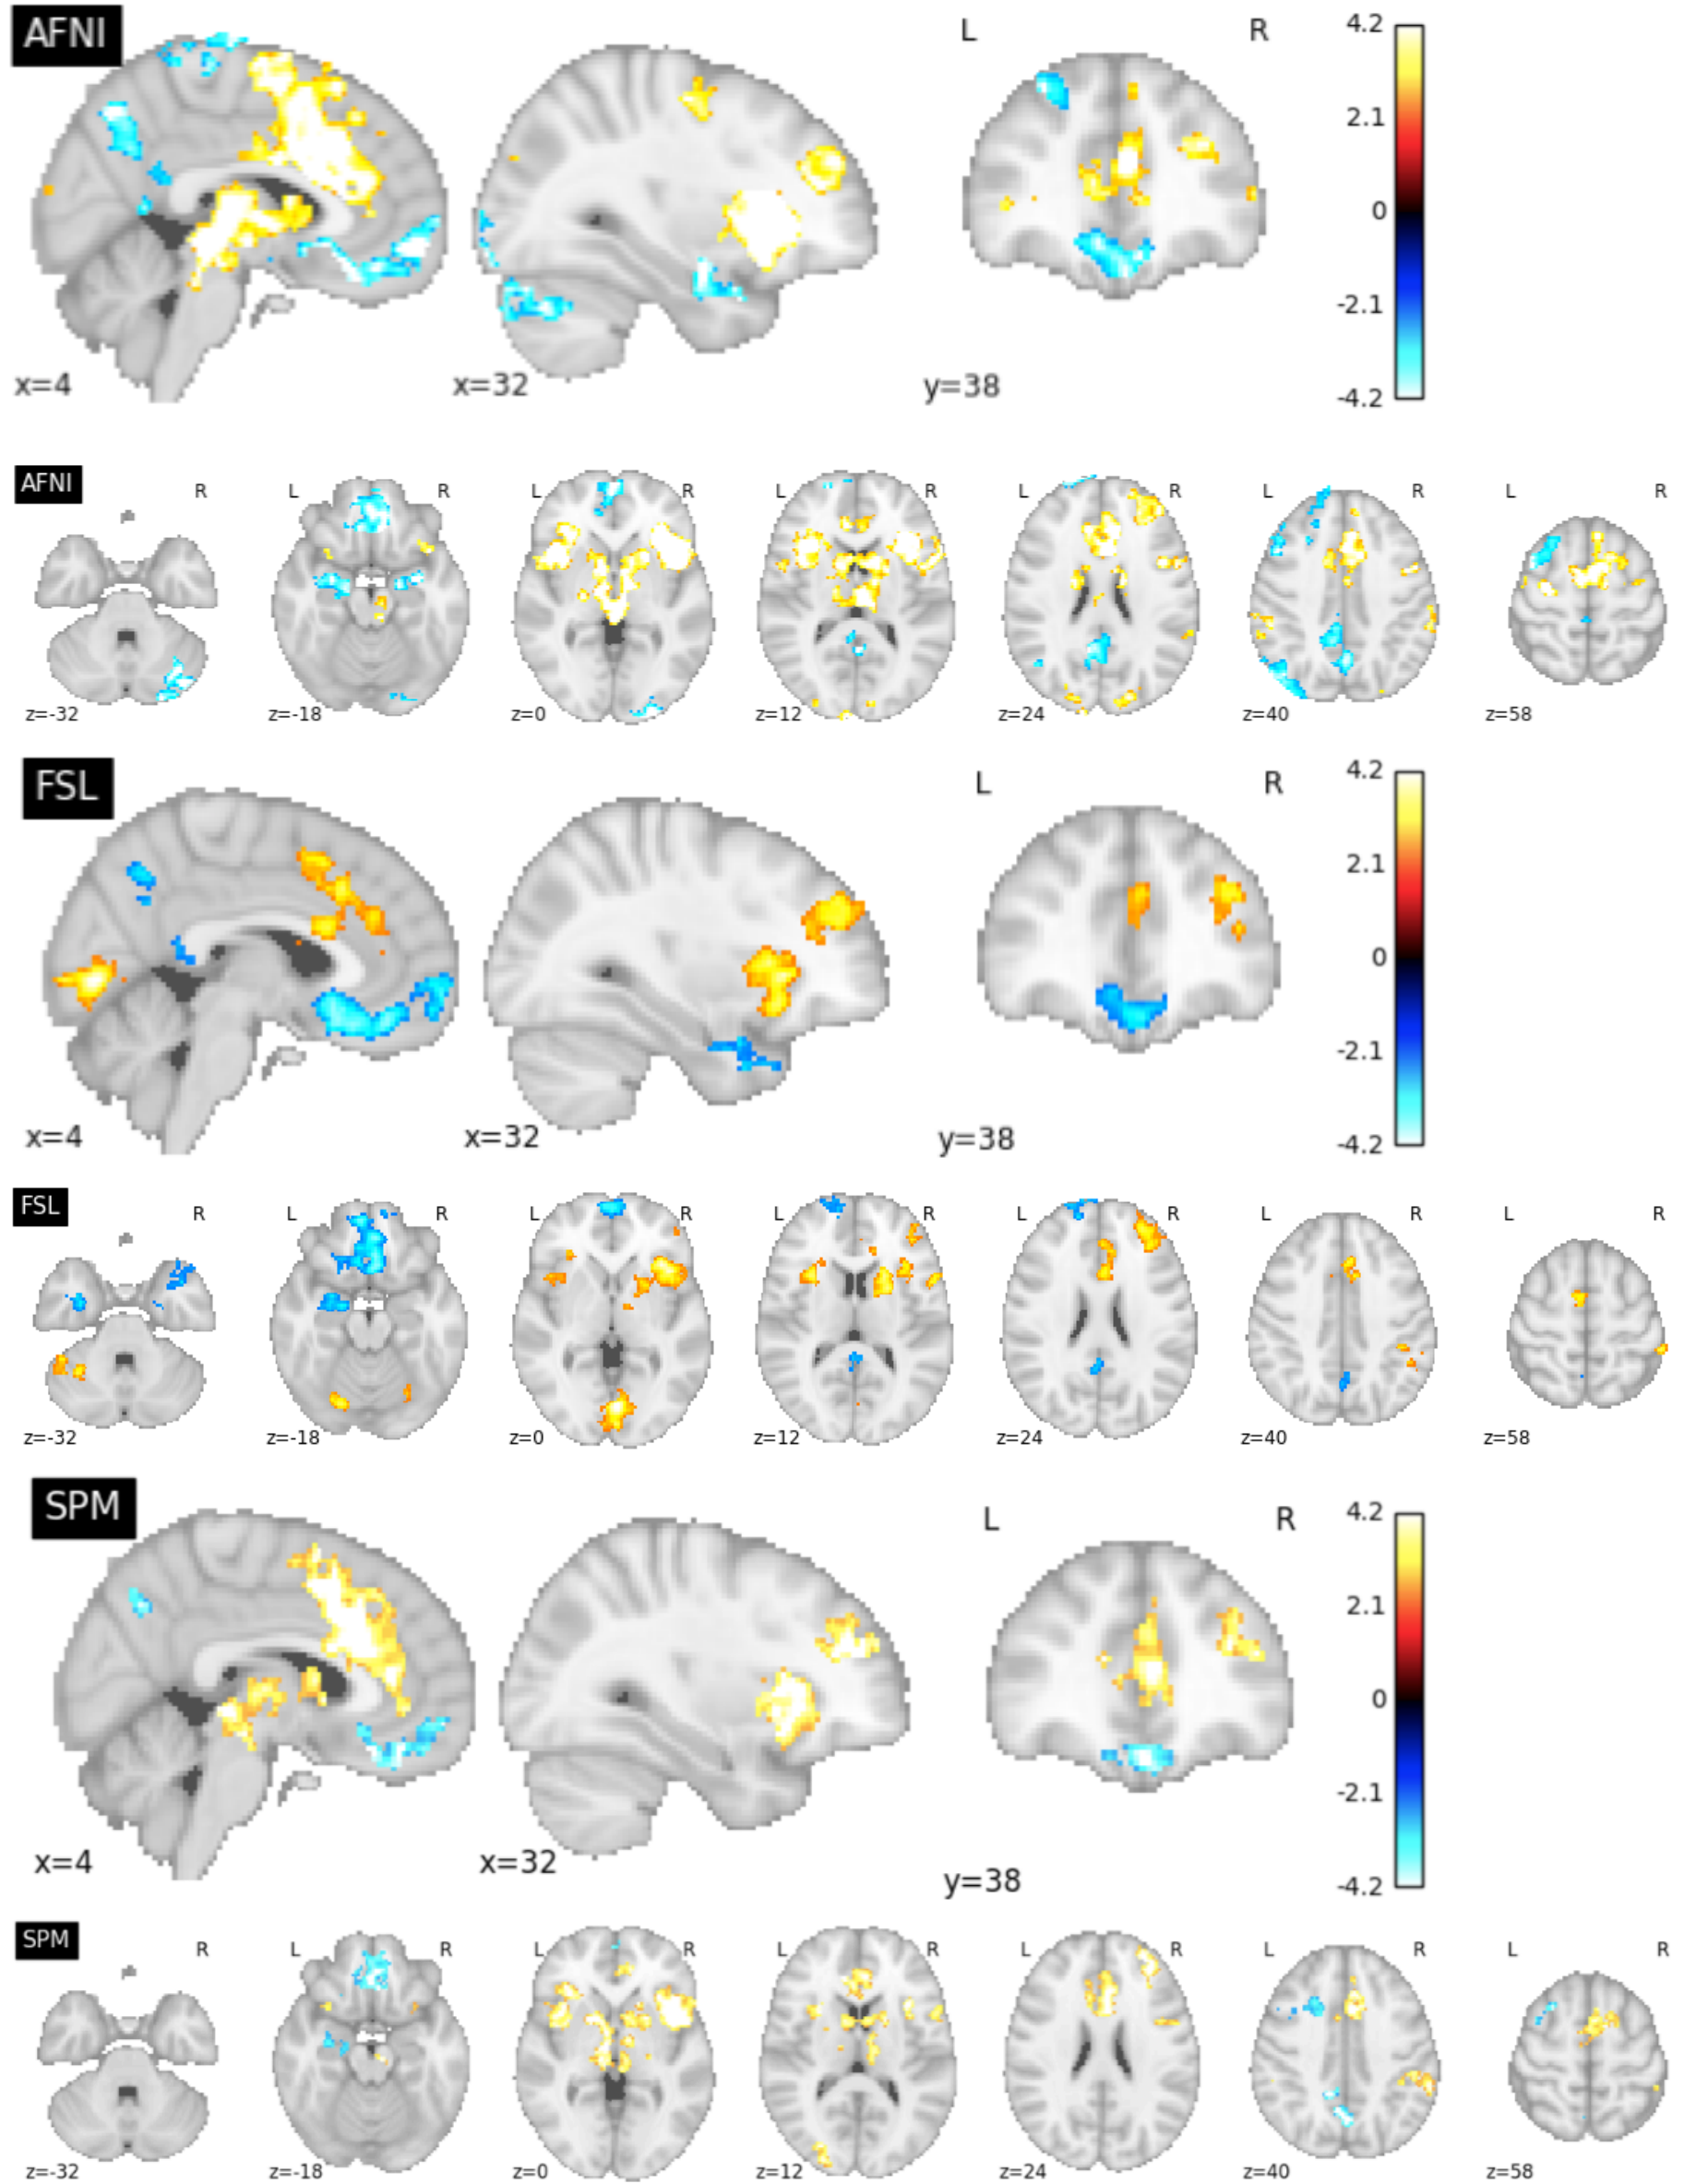

Figure S3. ds000001 Inter-Software Comparison, 5% FWE Clusterwise Permutation Inference

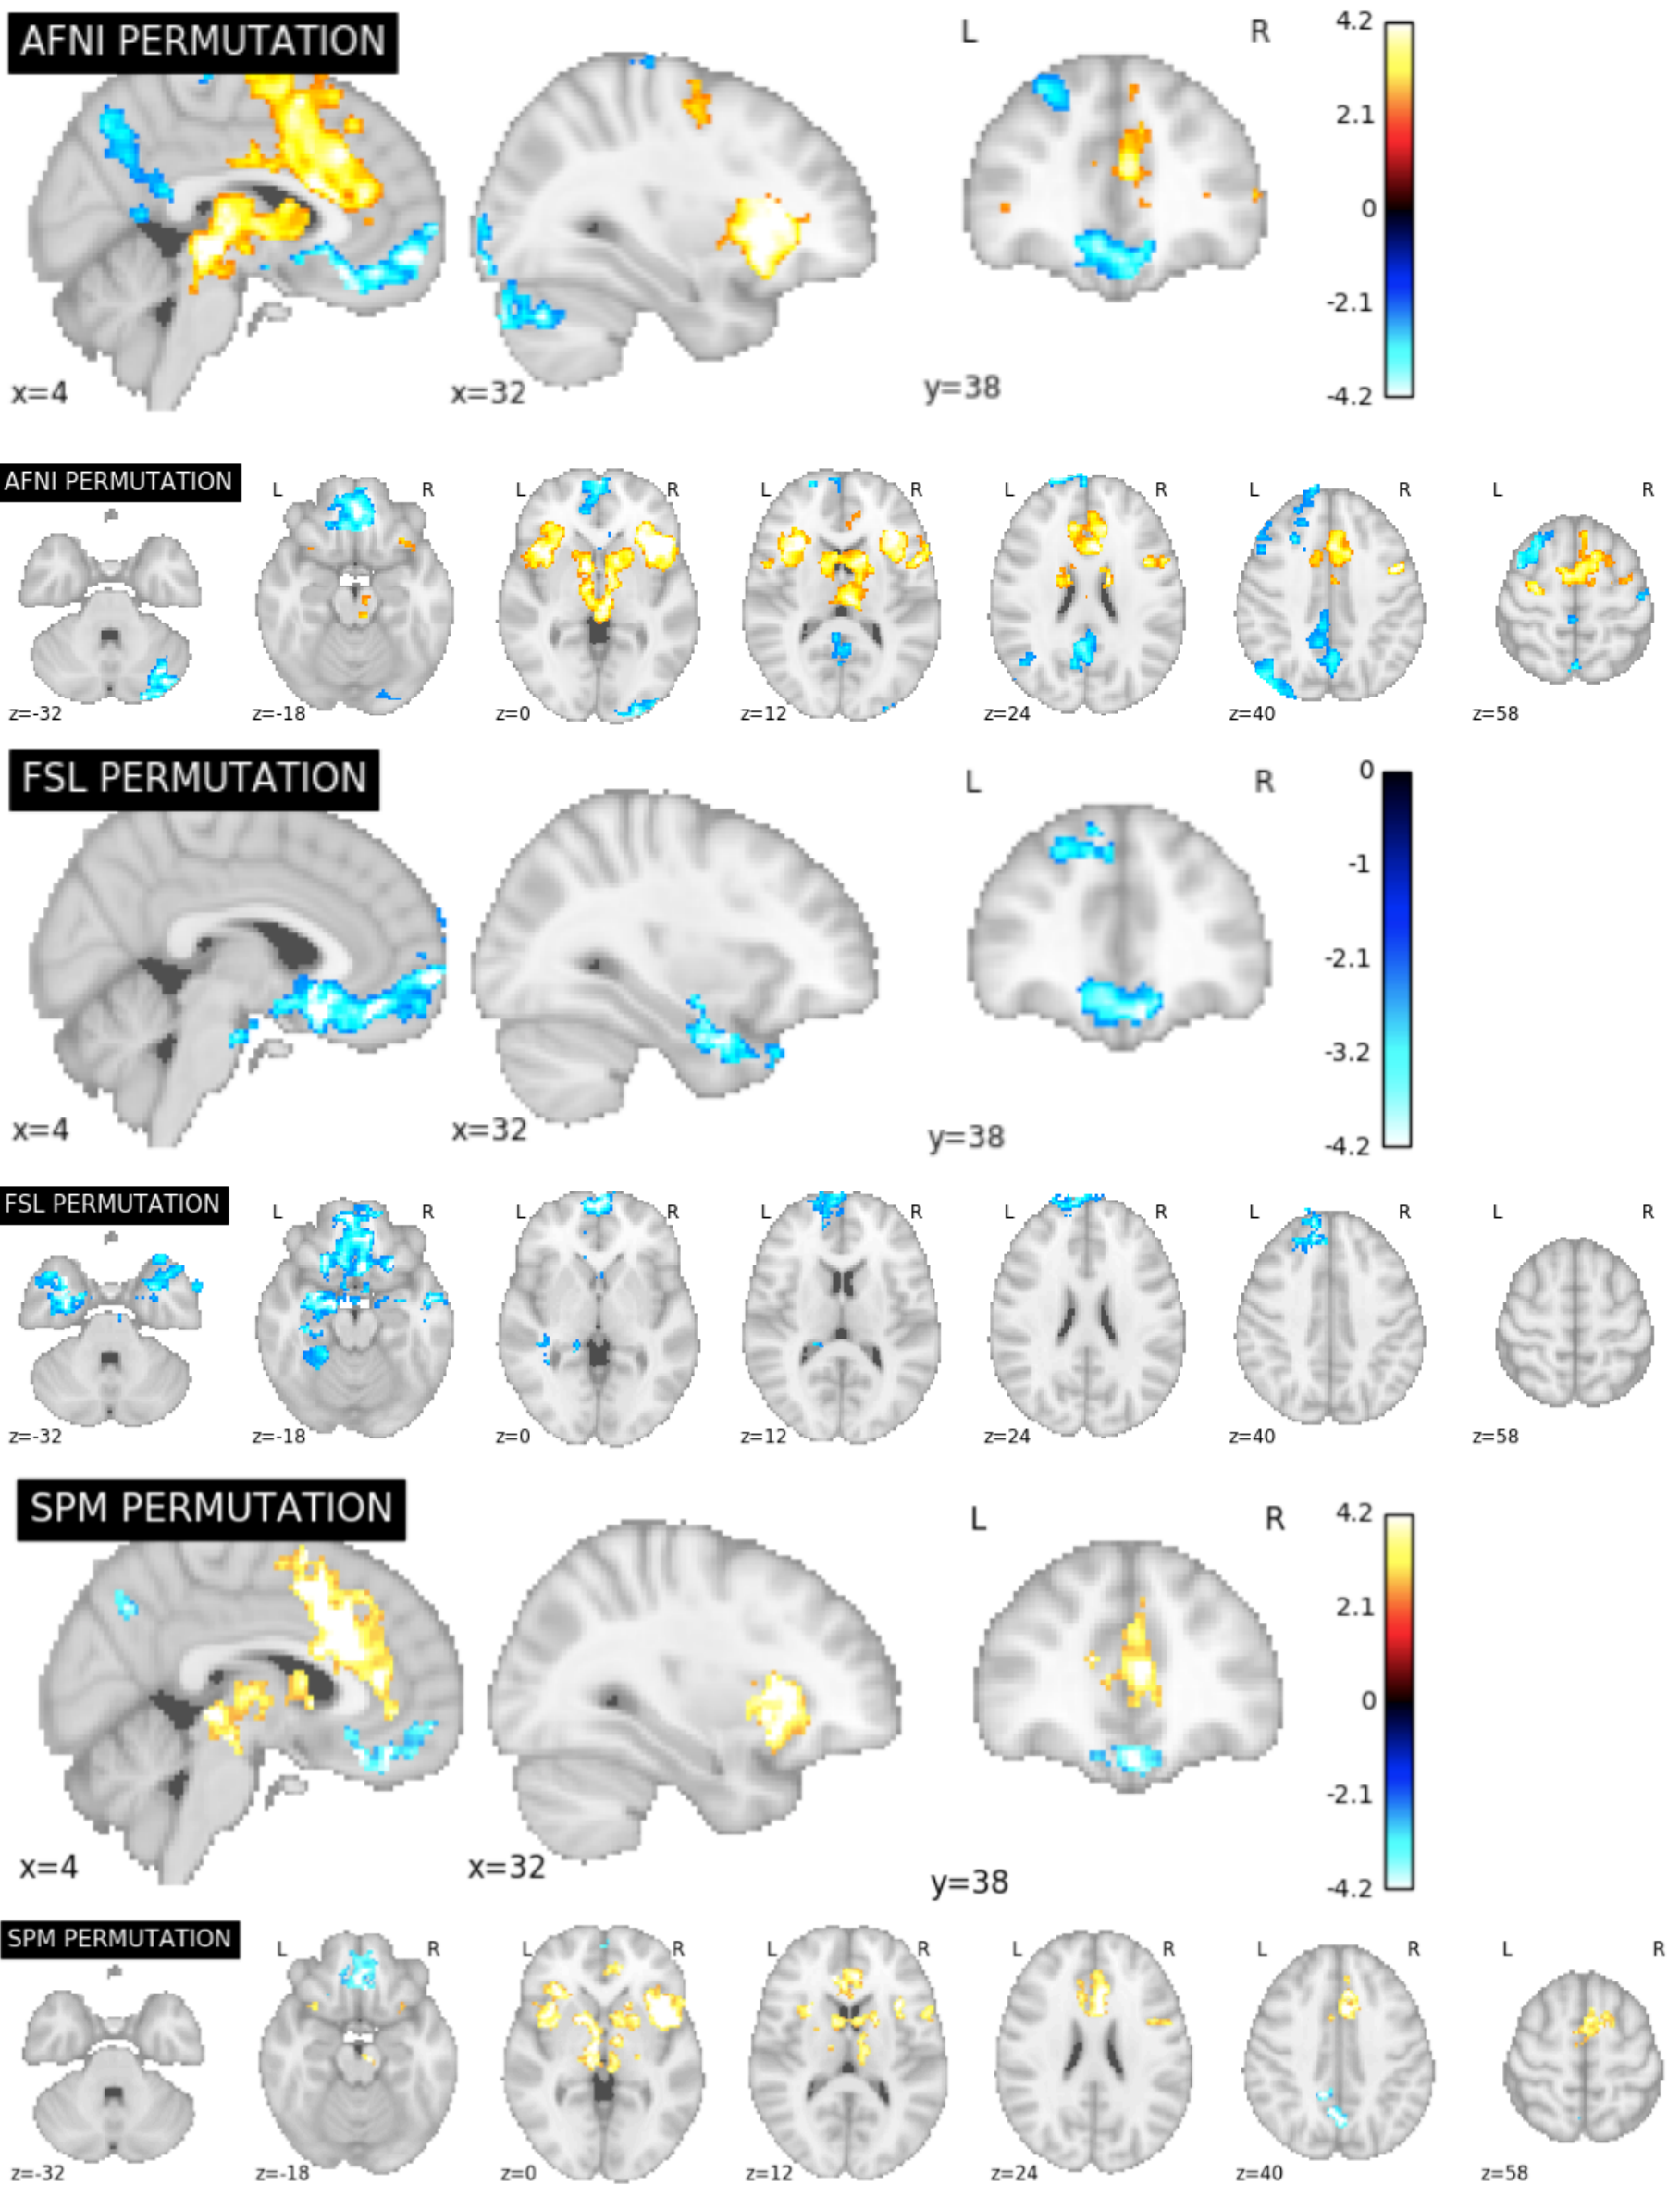



Figure S4. ds000109 Inter-Software Comparison, 5% FWE Clusterwise Inference

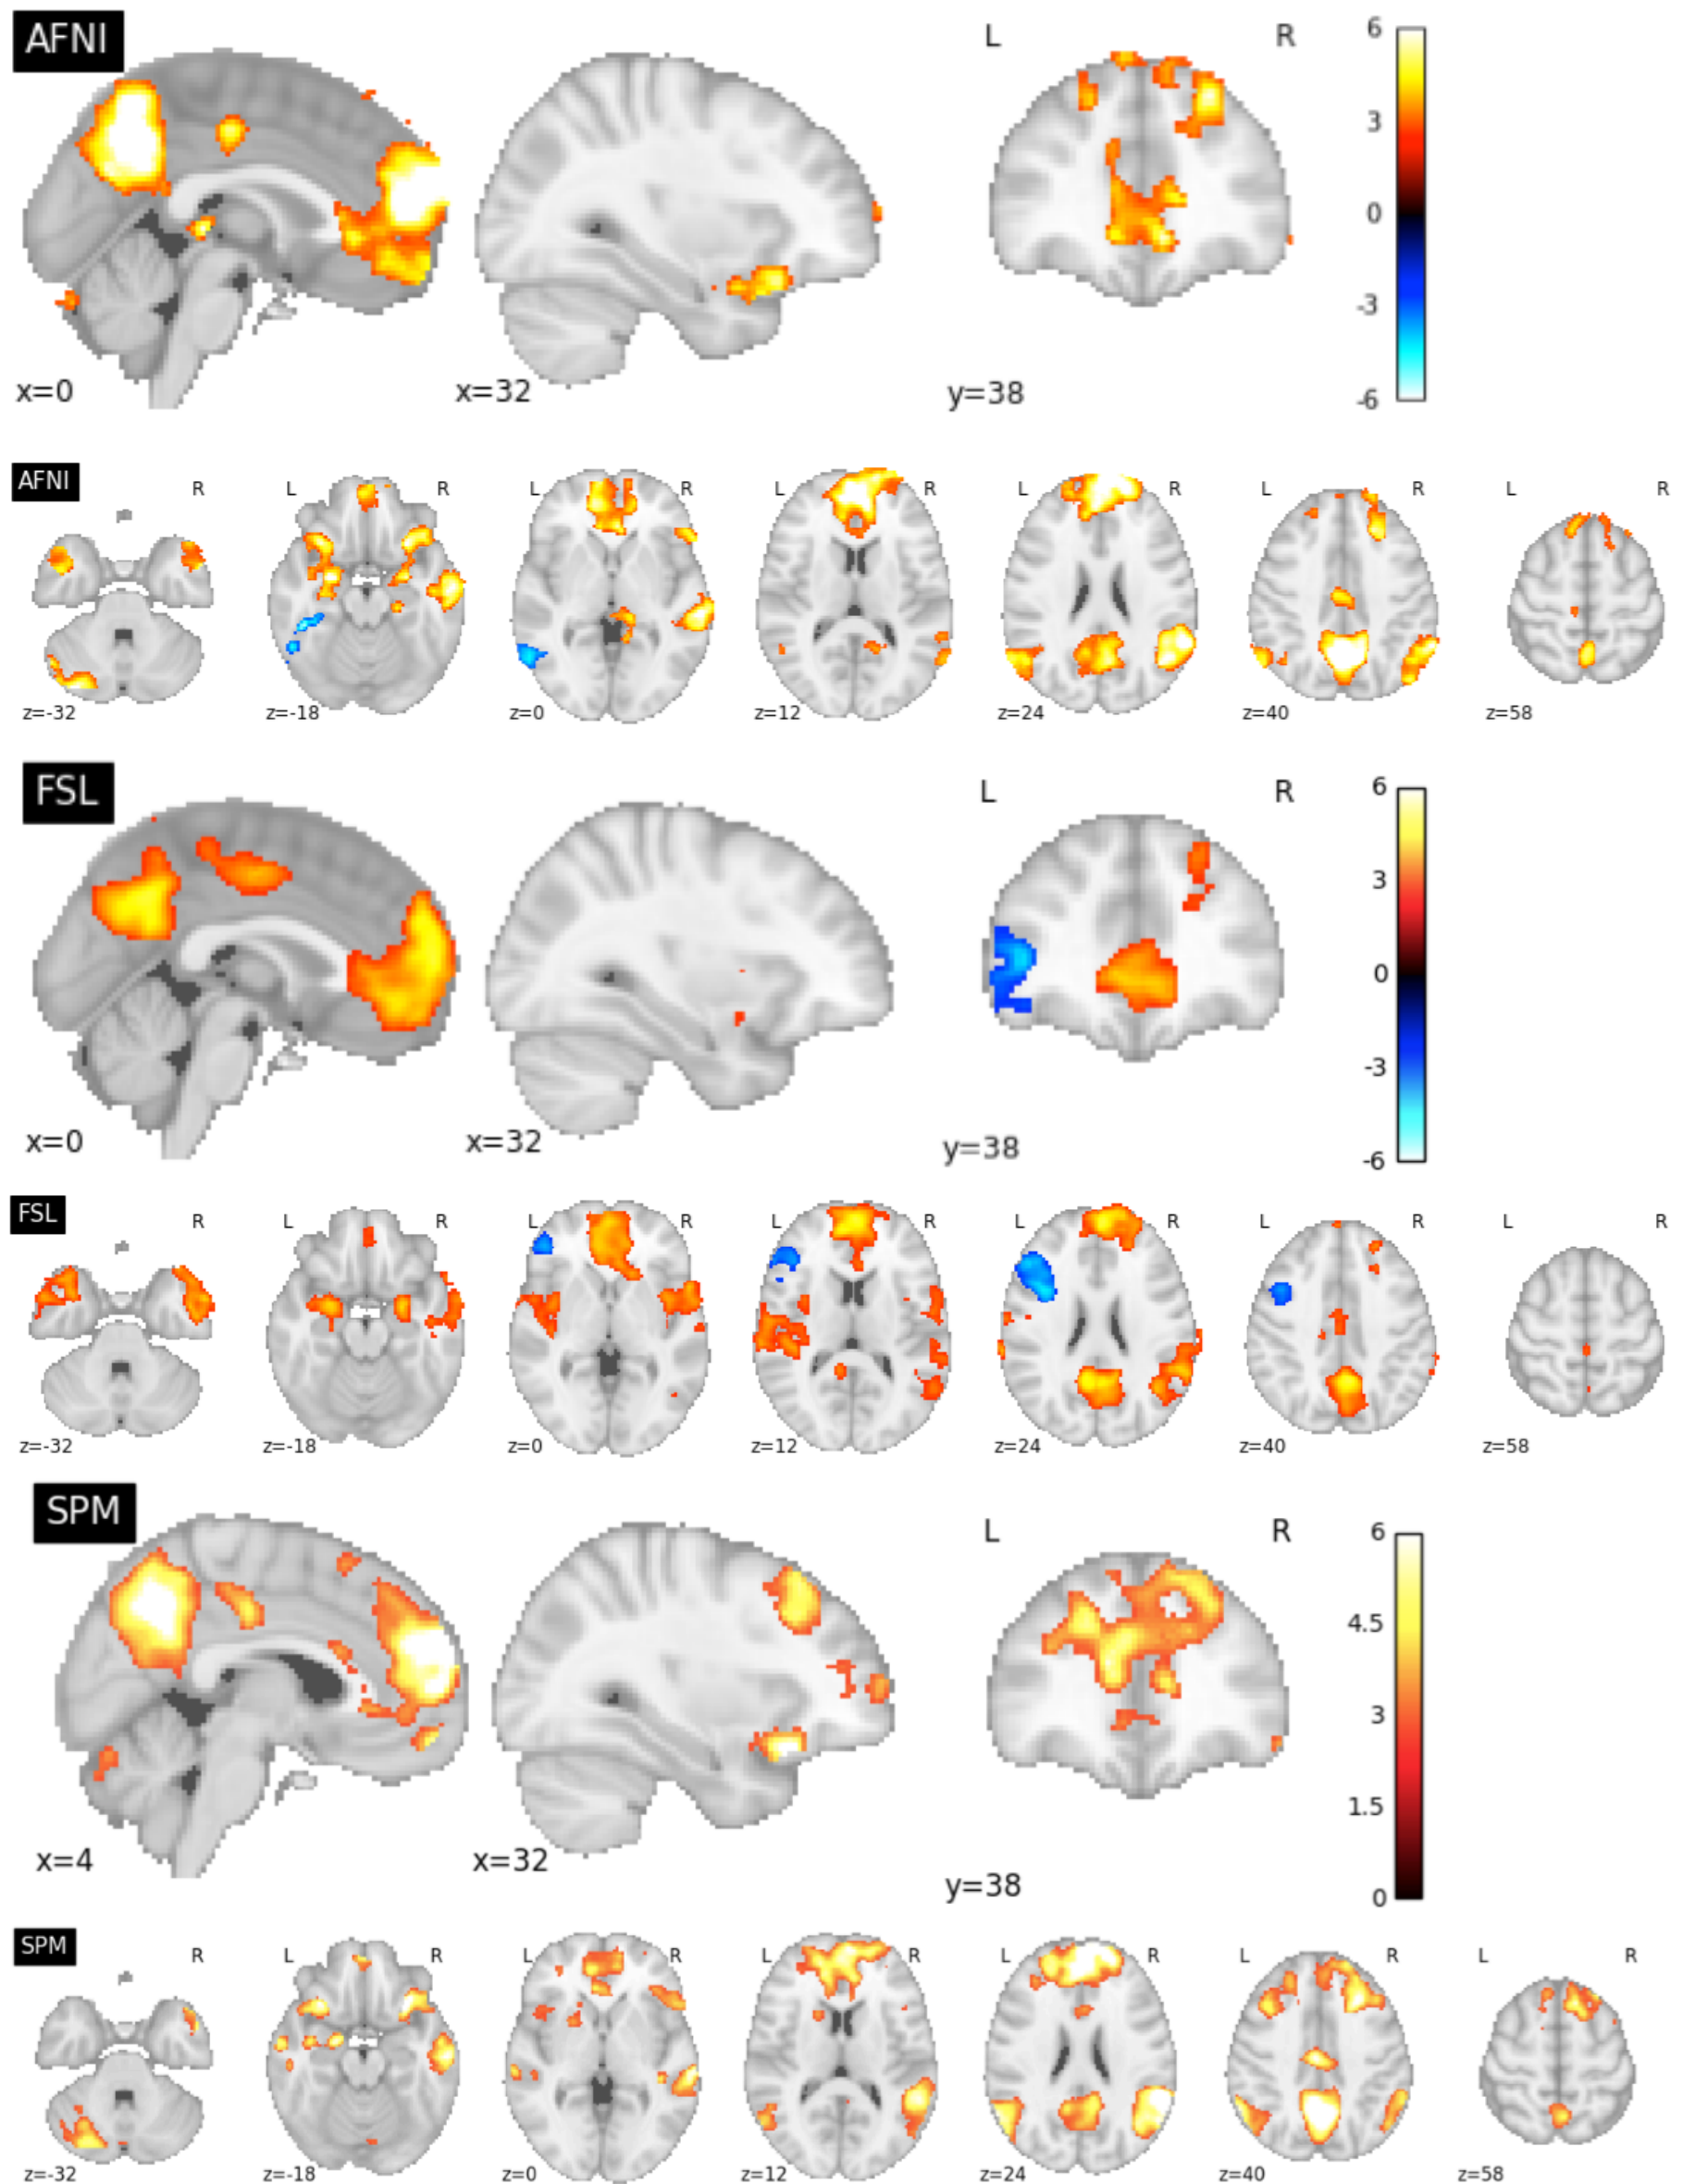

Figure S5. ds000109 Inter-Software Comparison, 5% FWE Clusterwise Permutation Inference

**AFNI PERMUTATION**

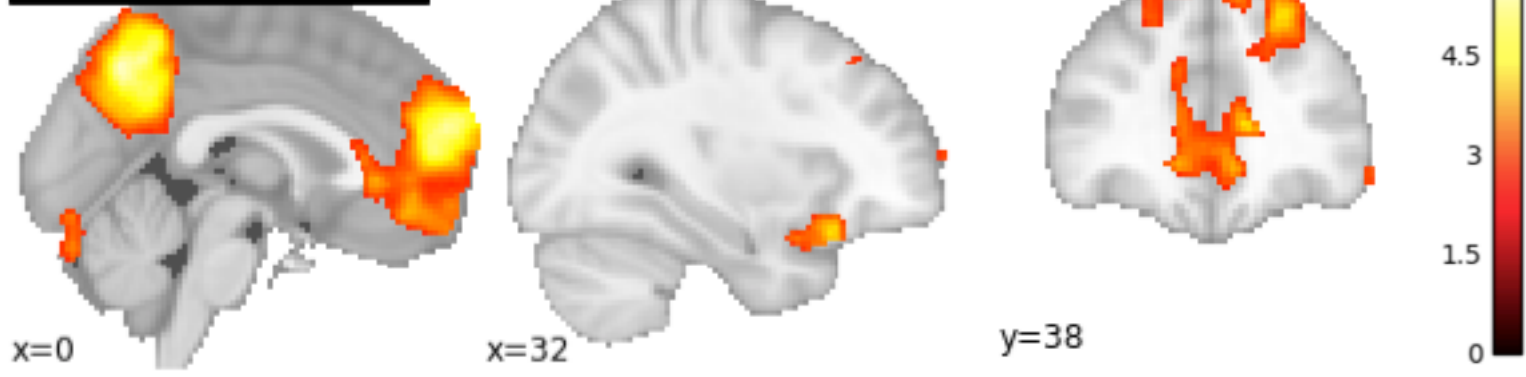

**AFNI PERMUTATION**

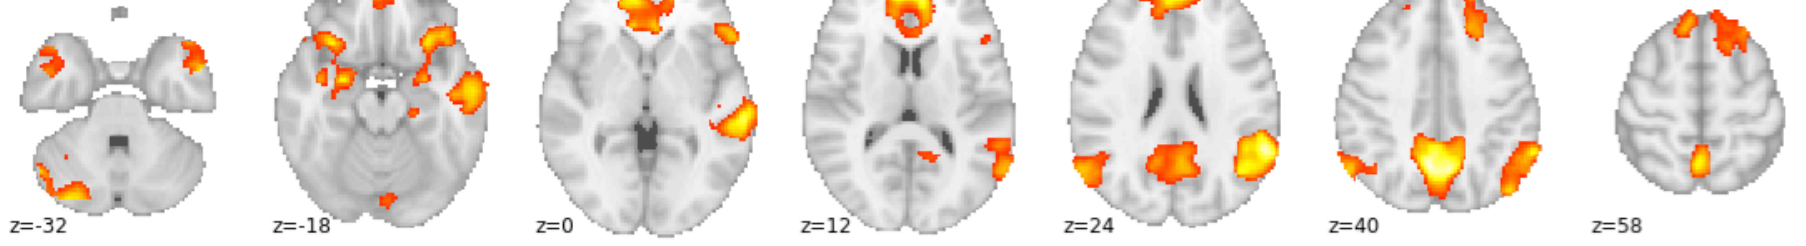

**FSL PERMUTATION**

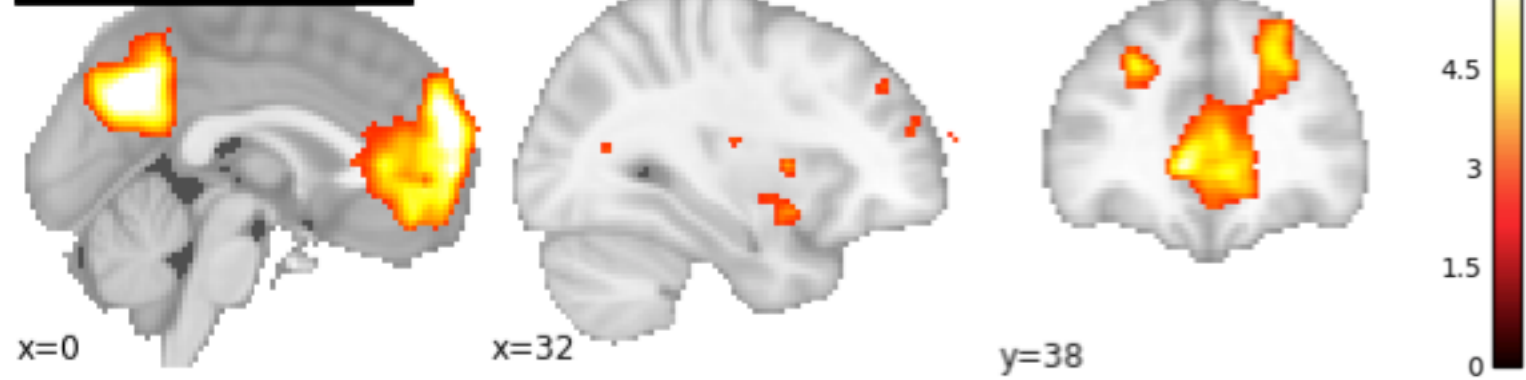

**FSL PERMUTATION**

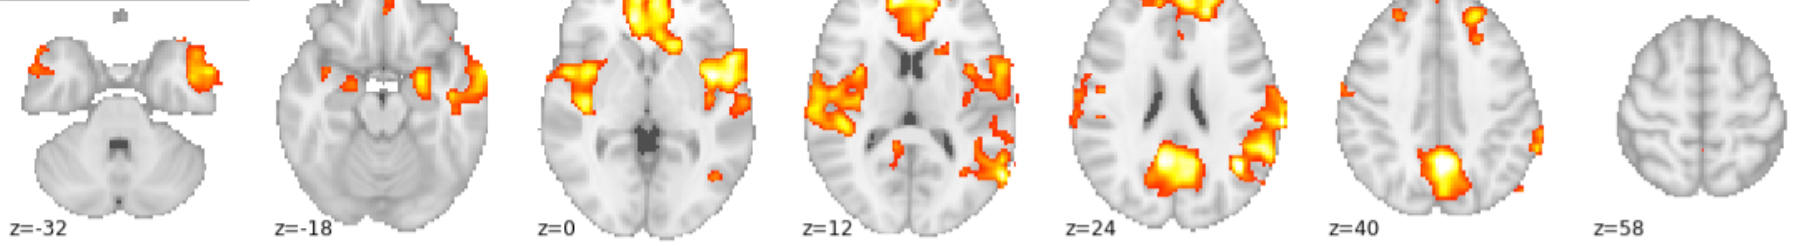

**SPM PERMUTATION**

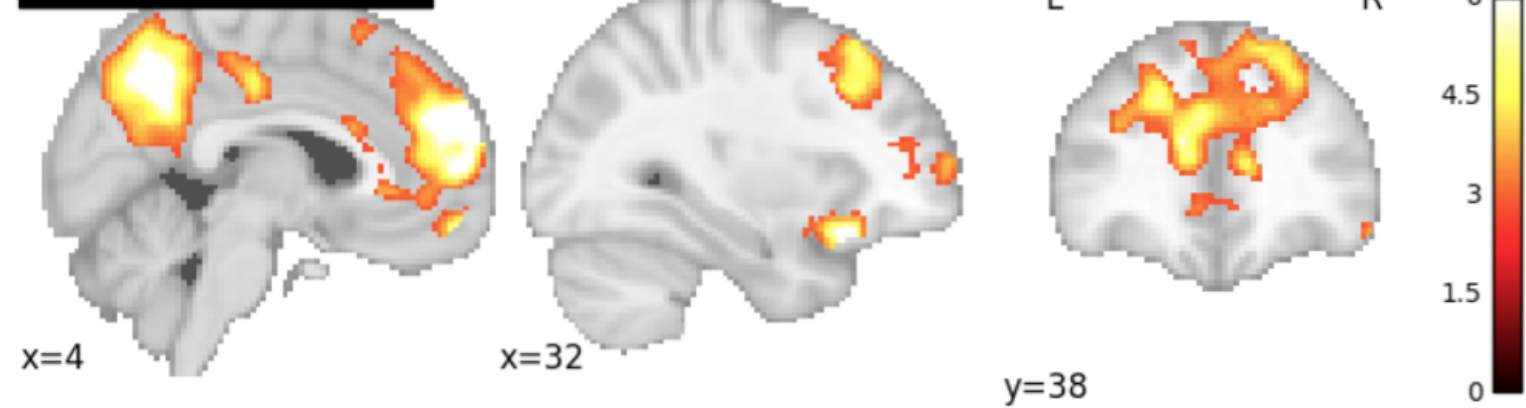

**SPM PERMUTATION**

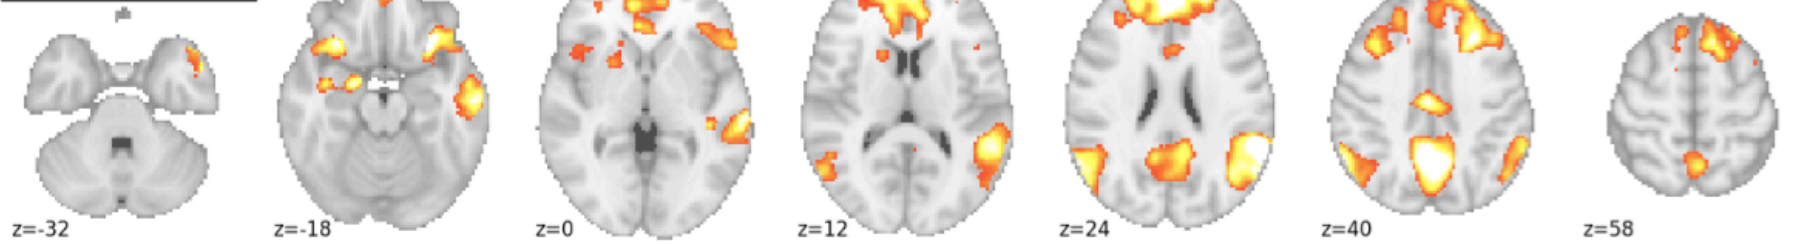

Figure S6. ds000120 Inter-Software Comparison, 5% FWE Clusterwise Inference

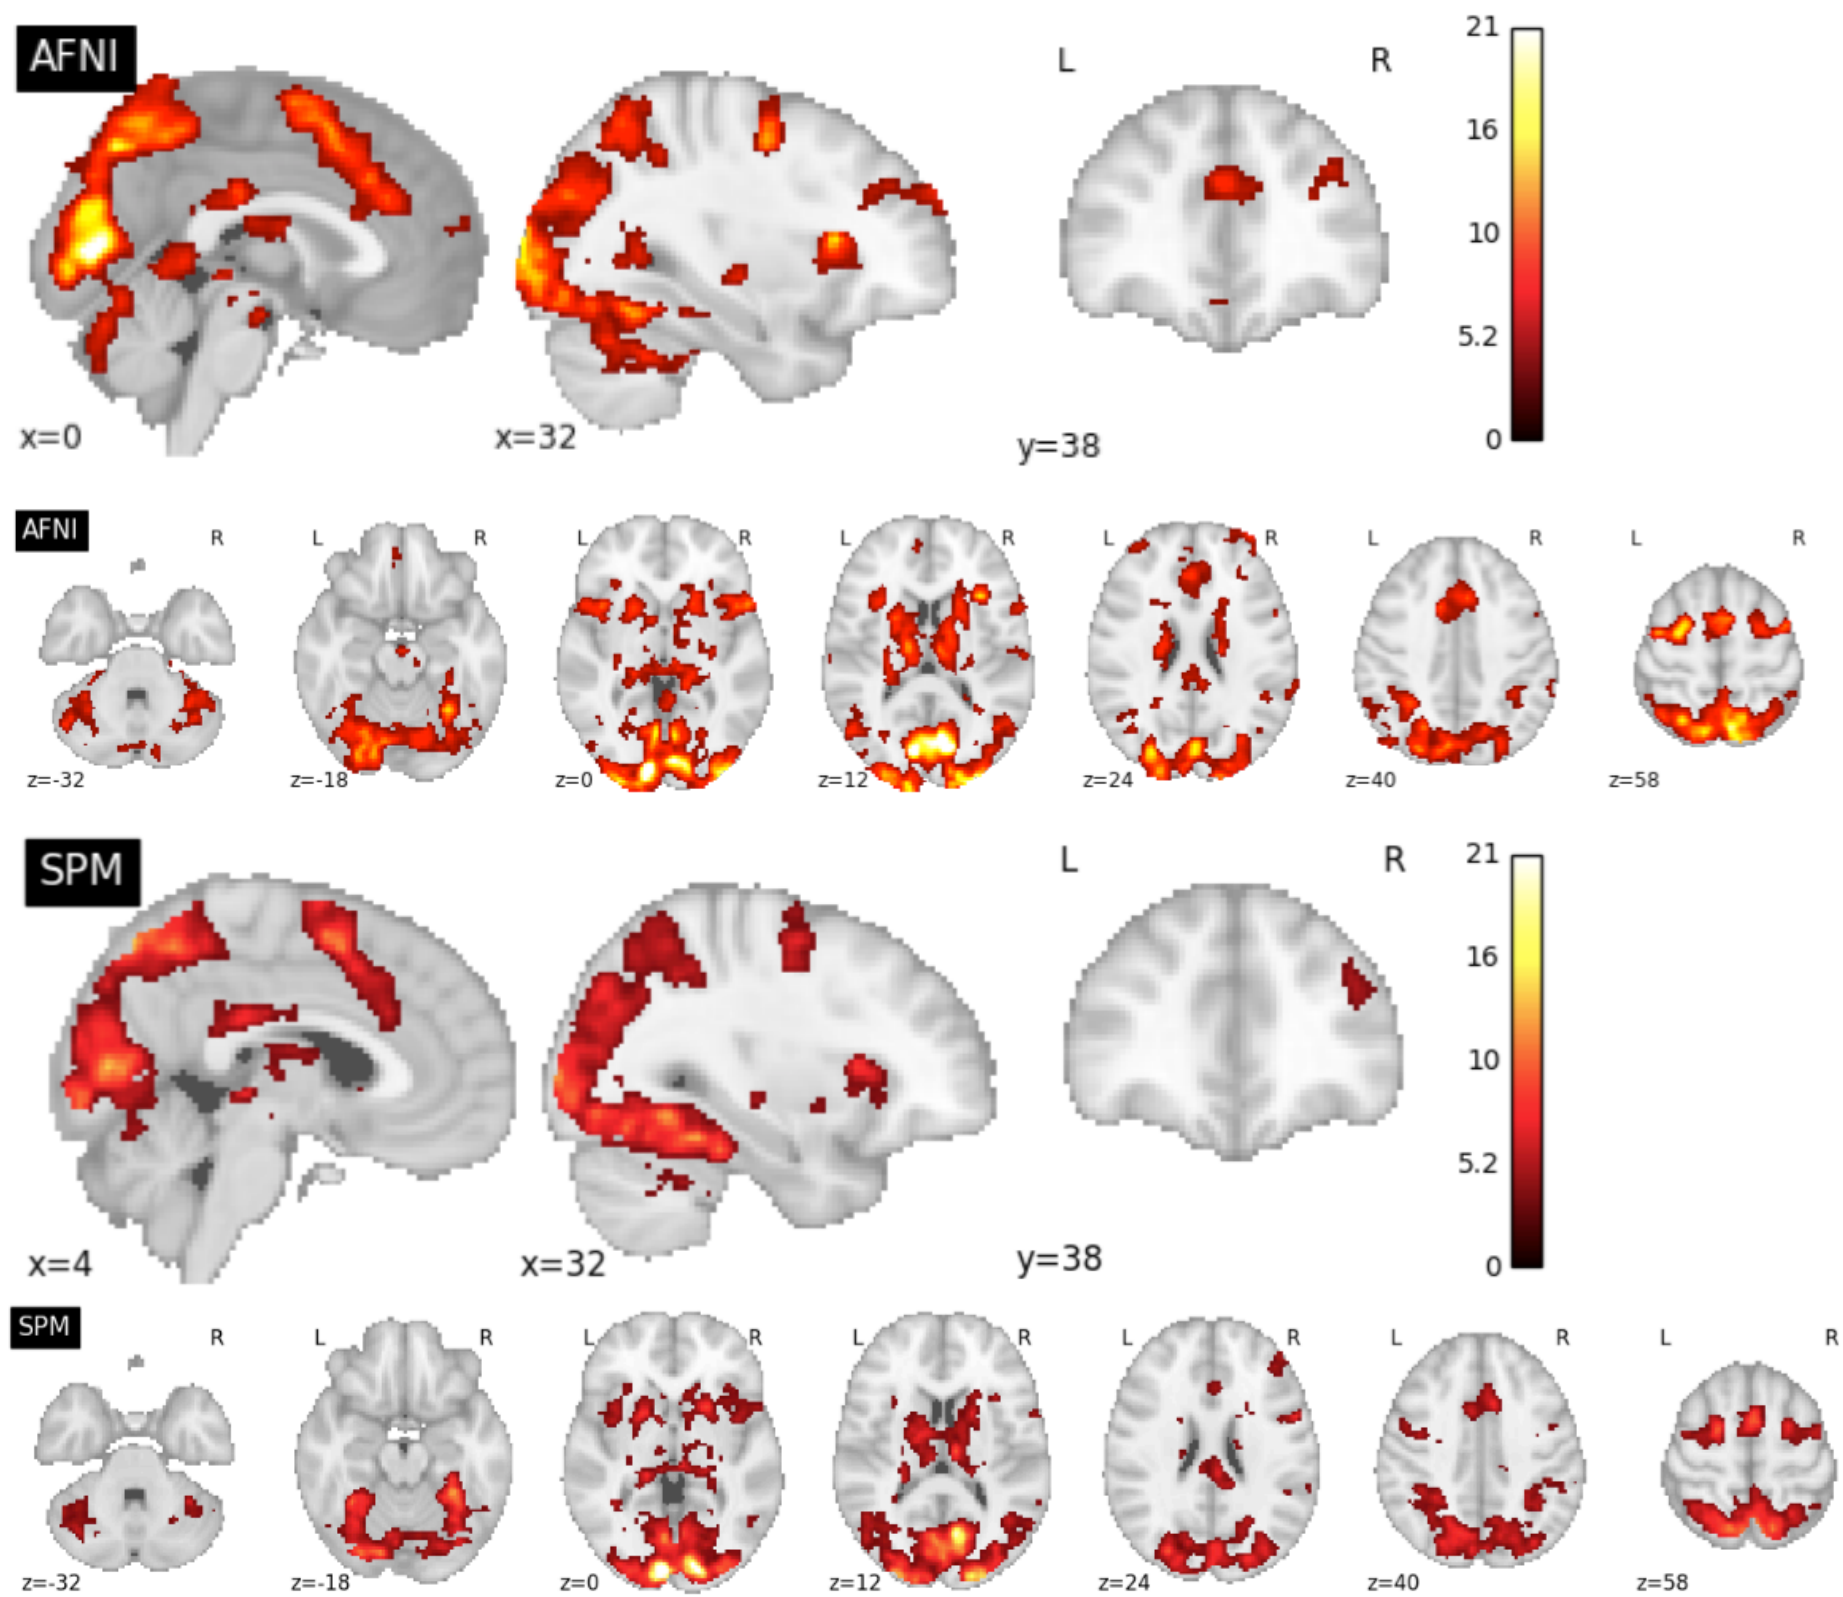



Figure S7. ds000001 Inter-Software Comparison, T-Statistic Maps

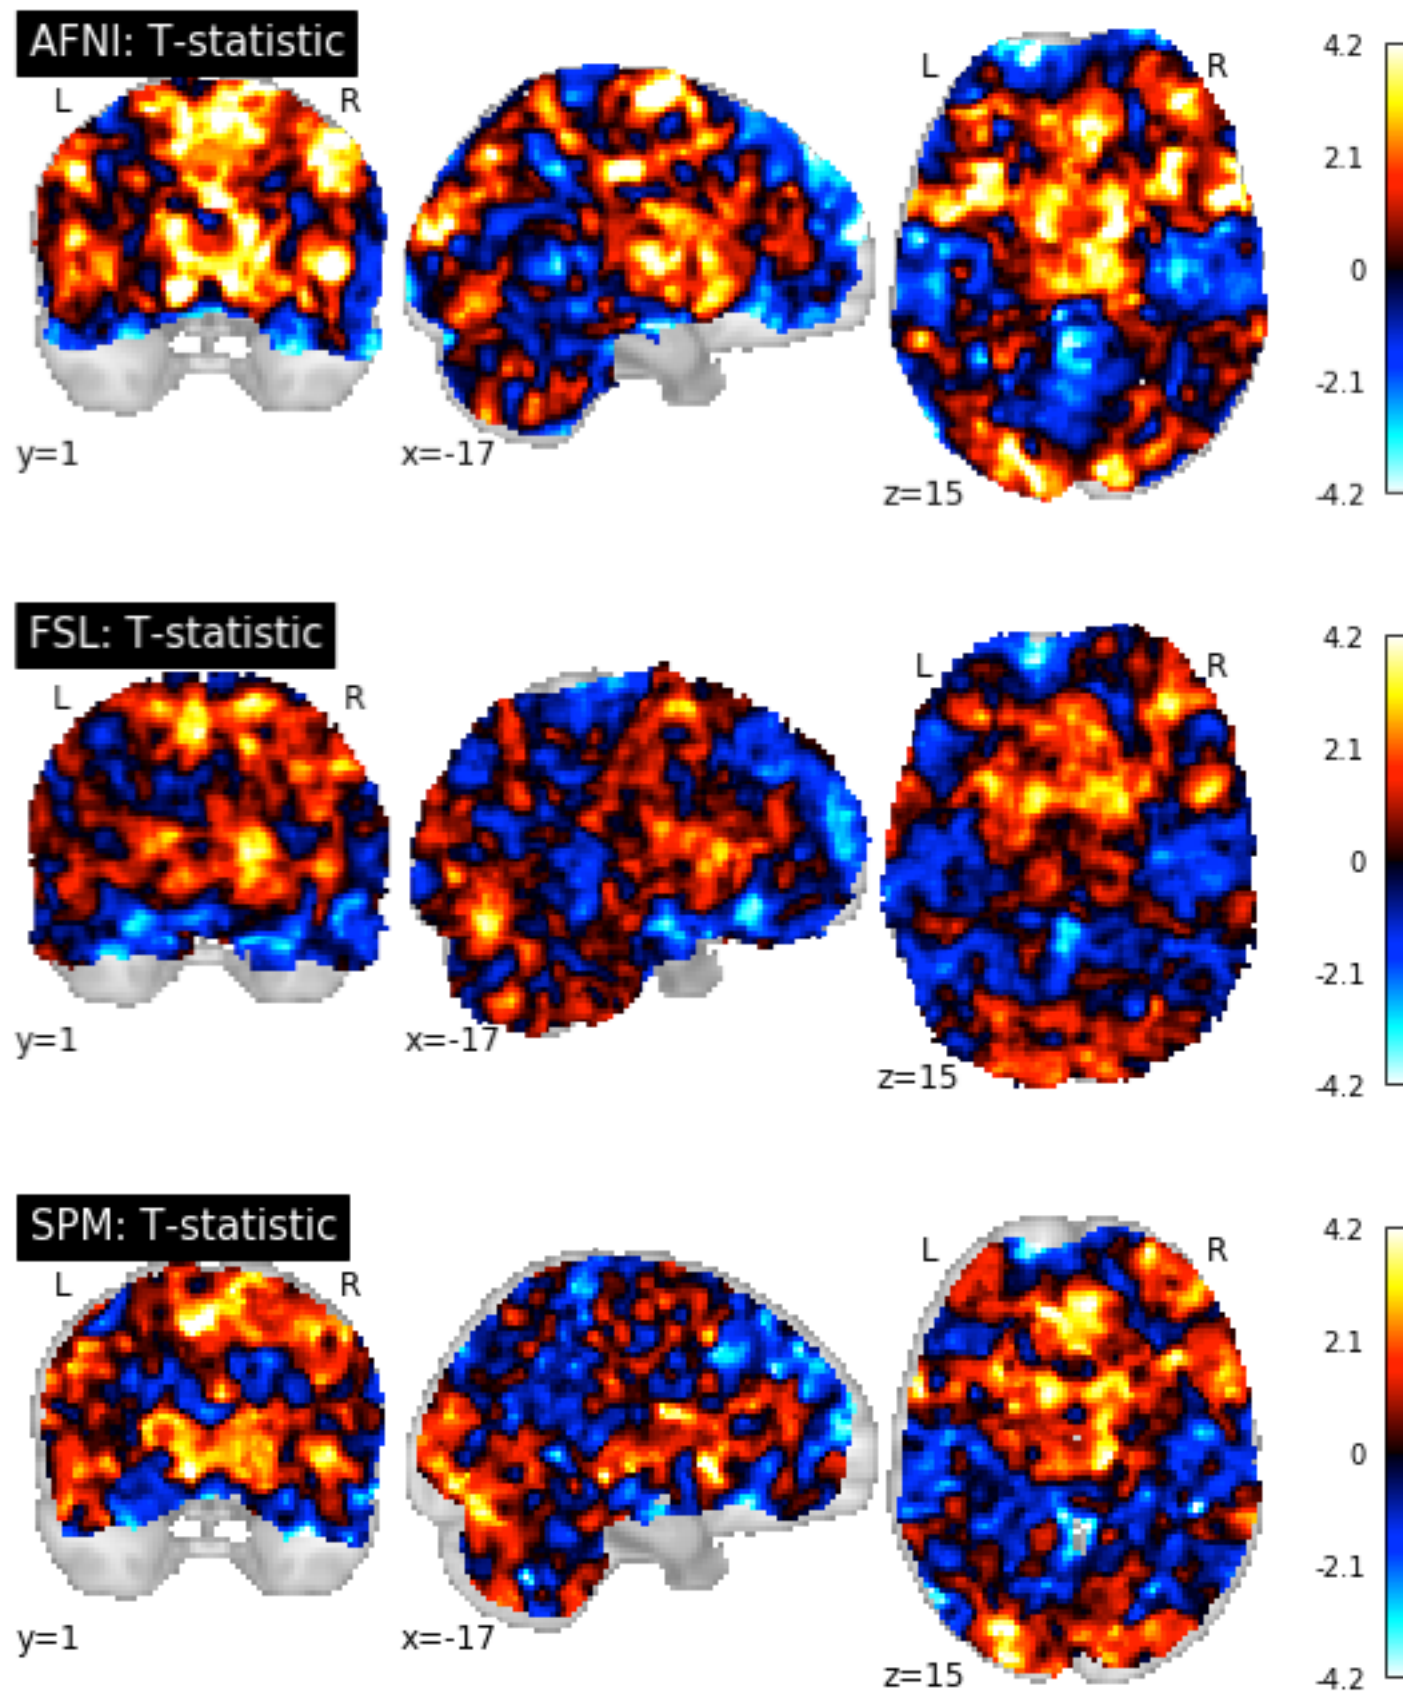

Figure S8. ds000001 Inter-Software Comparison, T-Statistic Maps from Permutation

**AFNI: Permutation T-statistic**

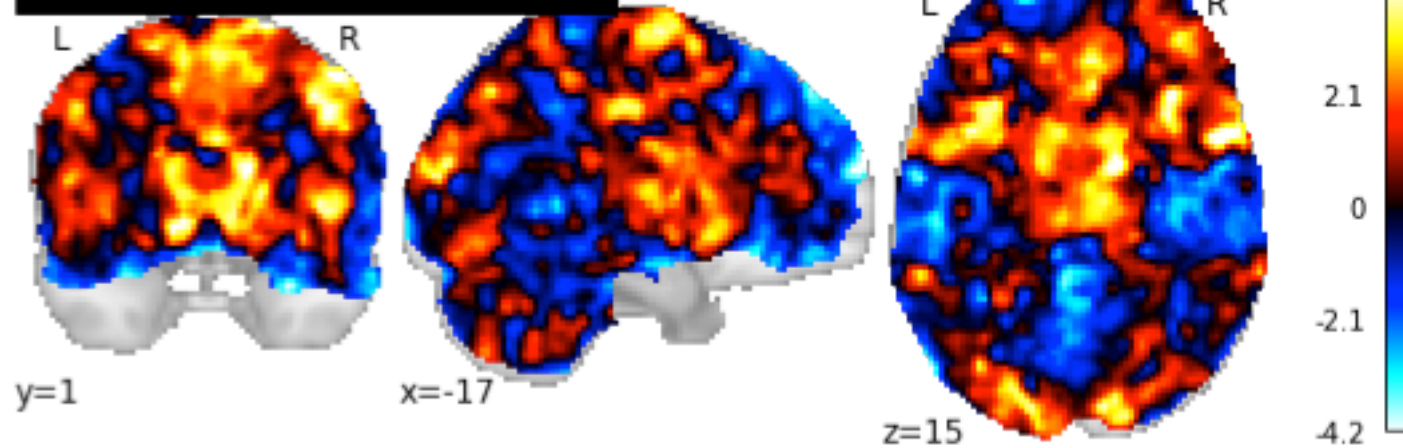

**FSL: Permutation T-statistic**

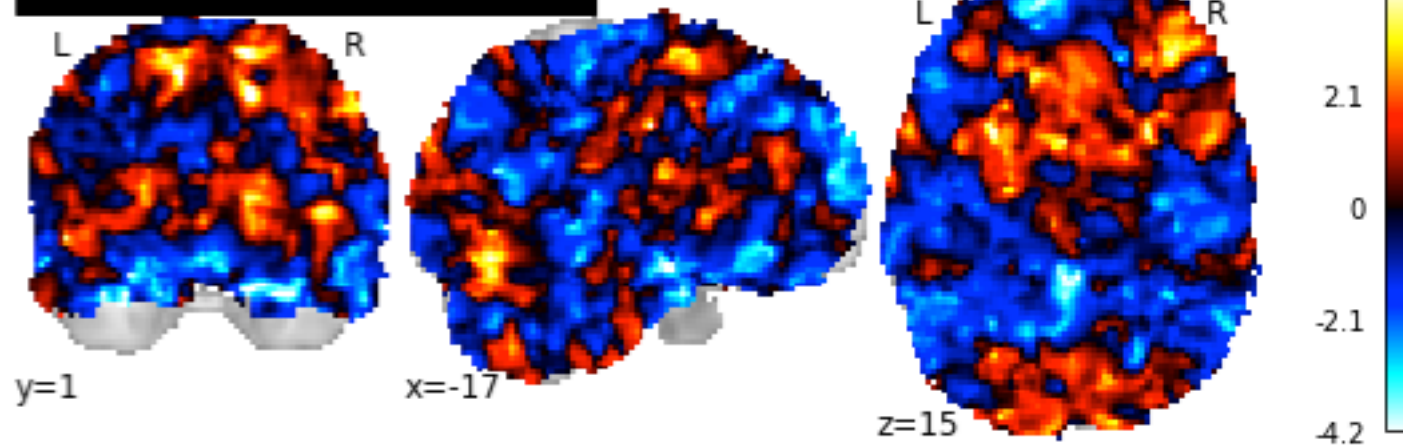

**SPM: Permutation T-statistic**

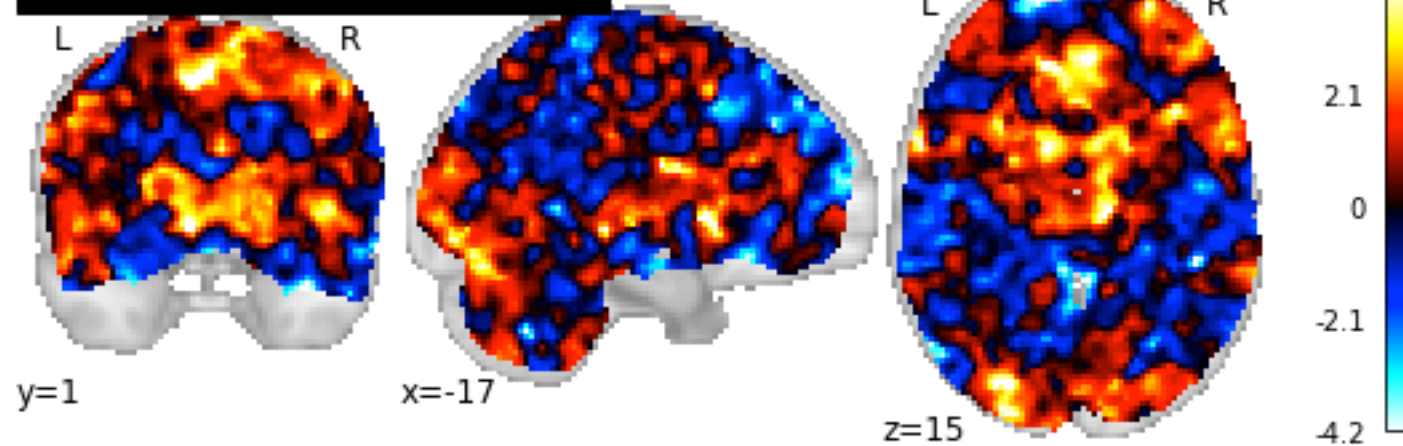



Figure S9. ds000109 Inter-Software Comparison, T-Statistic Maps

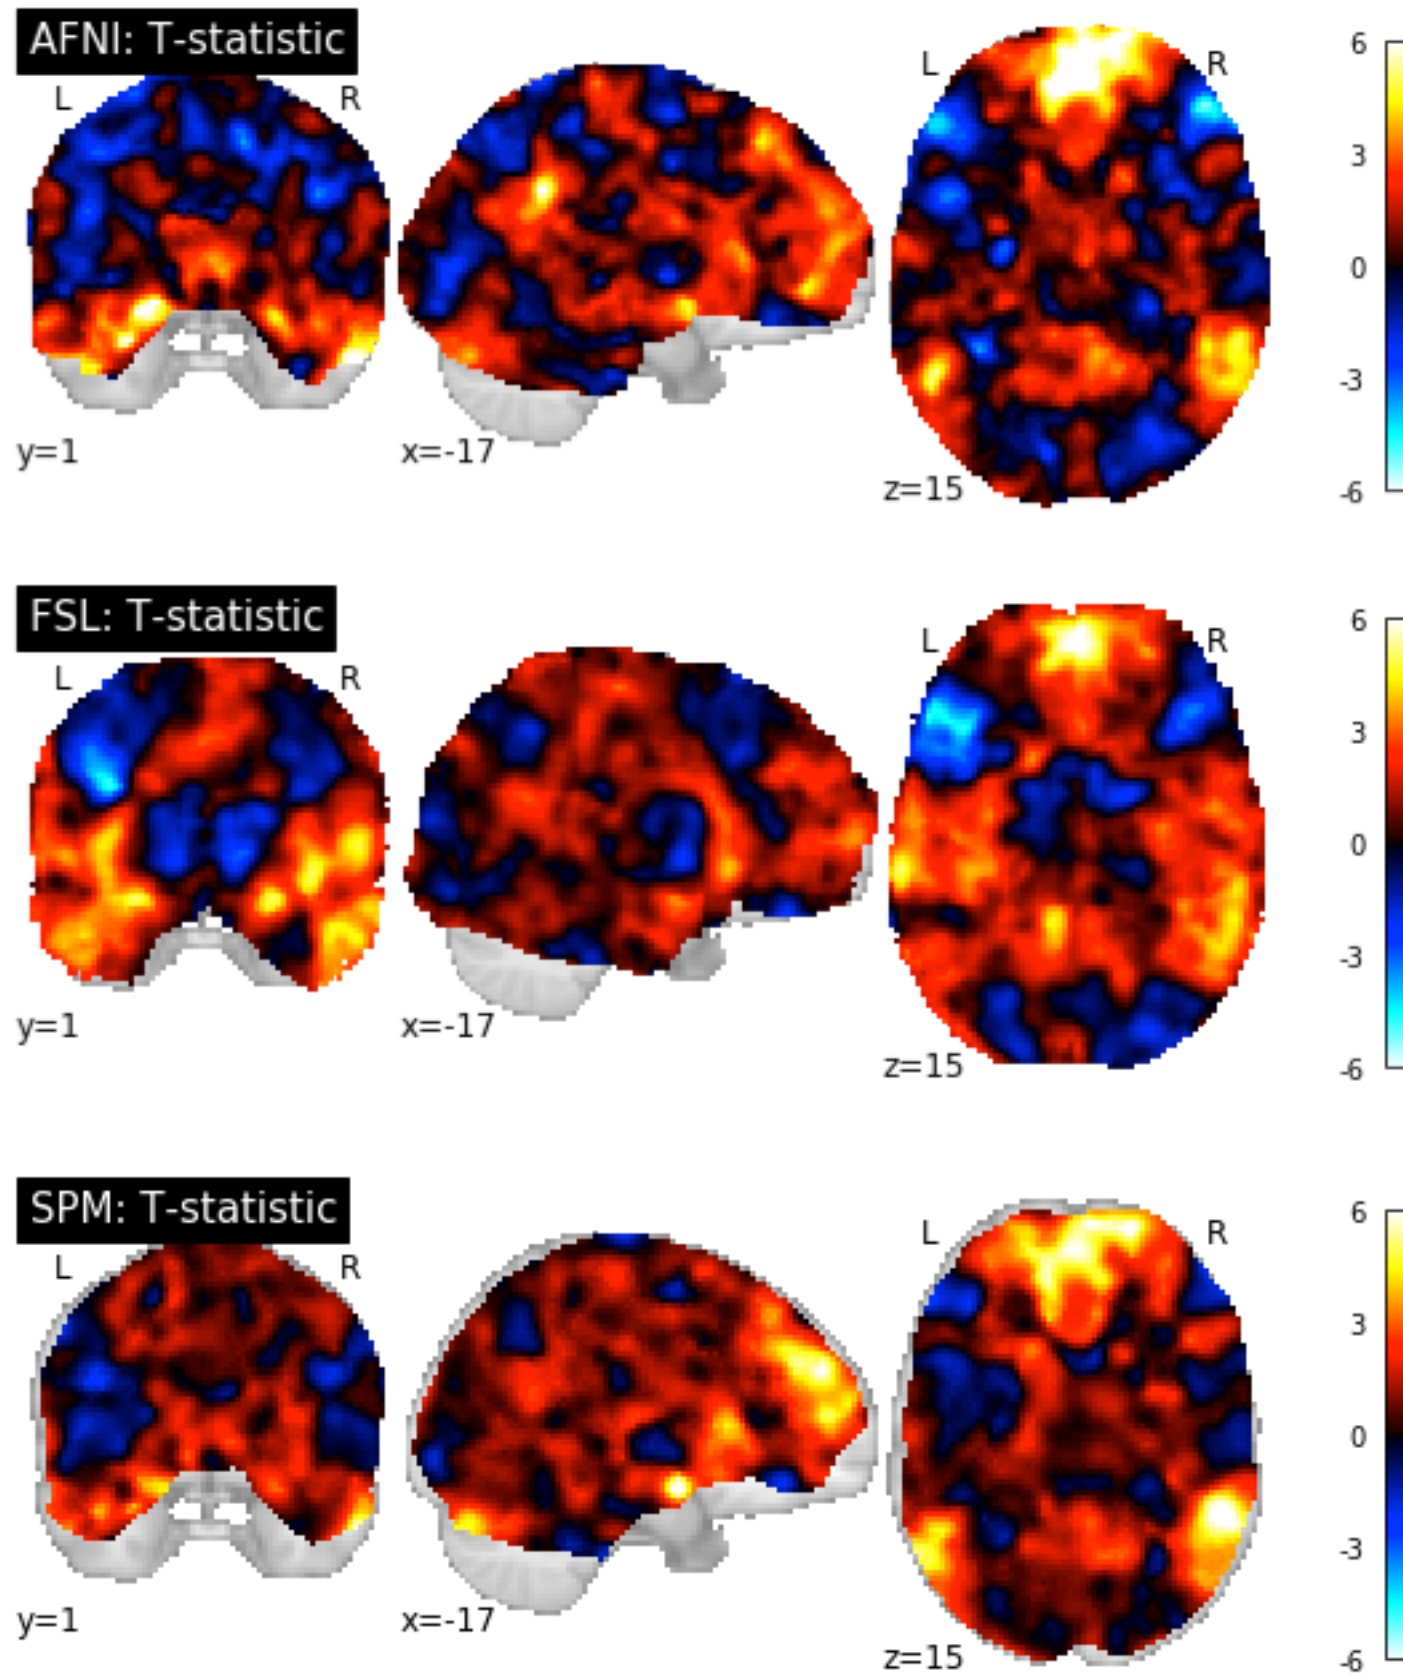

Figure S10. ds000109 Inter-Software Comparison, T-Statistic Maps from Permutation

**AFNI: Permutation T-statistic**

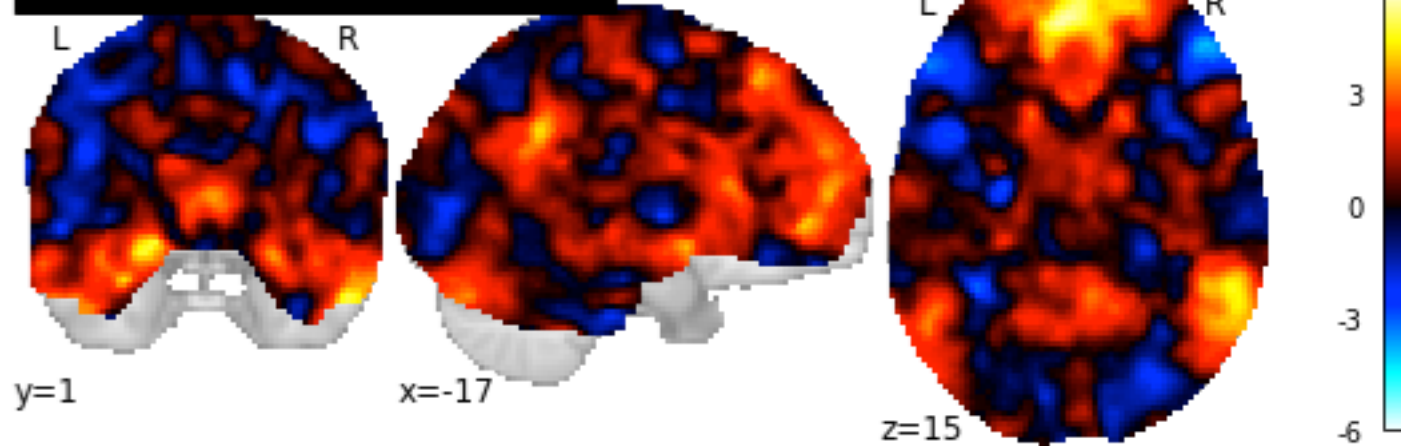

**FSL: Permutation T-statistic**

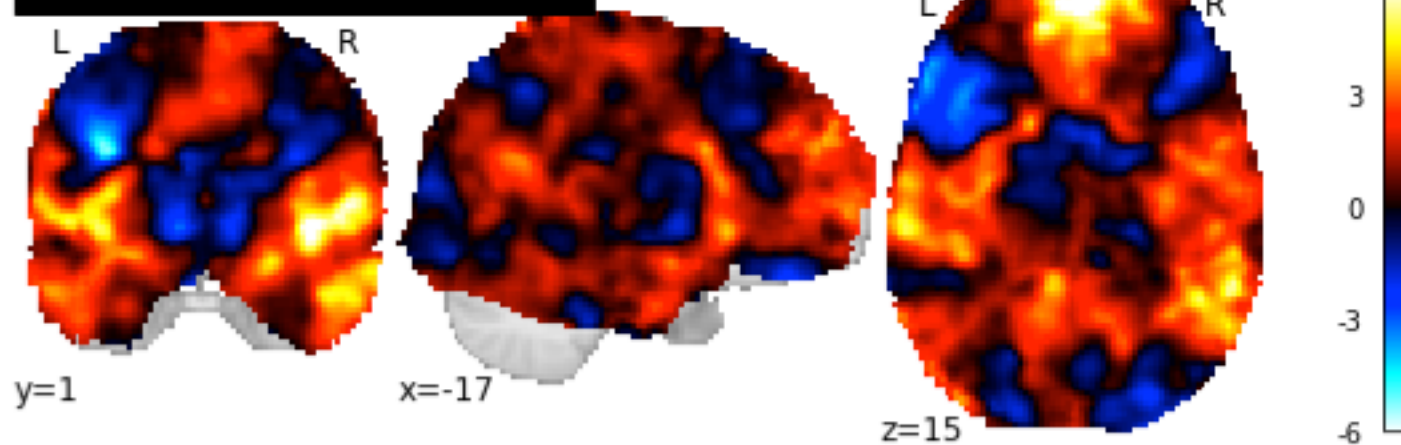

**SPM: Permutation T-statistic**

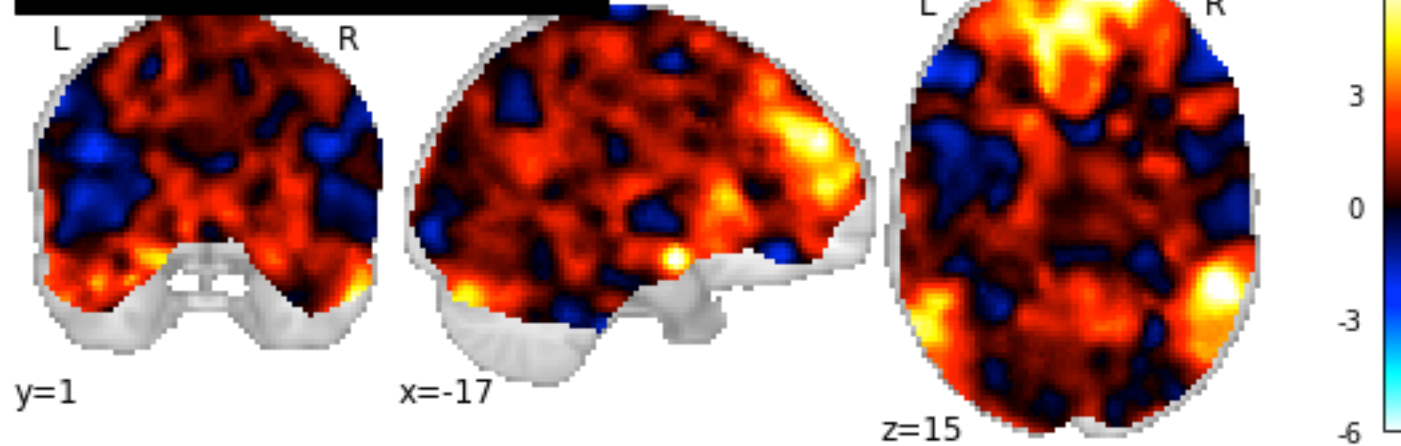

Figure S11. ds120 Inter-Software Comparison, F-Statistic Maps

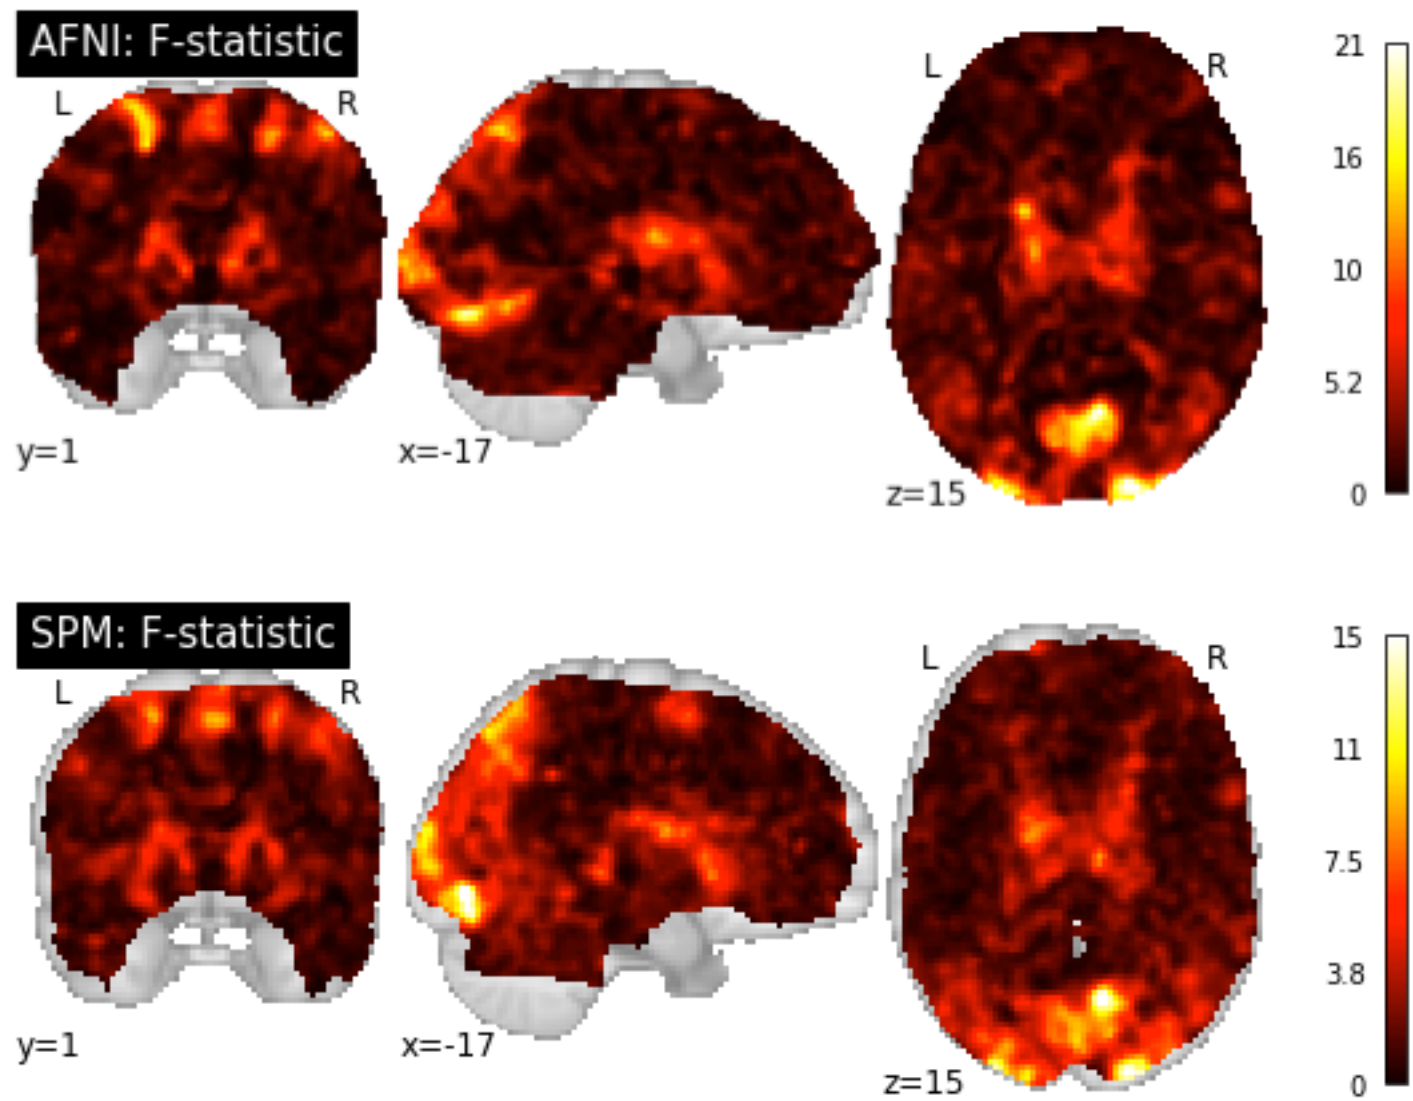



Figure S12. ds000120 Inter-Software Comparison, Euler Characteristic and Cluster Count Curves for F-Statistic Maps

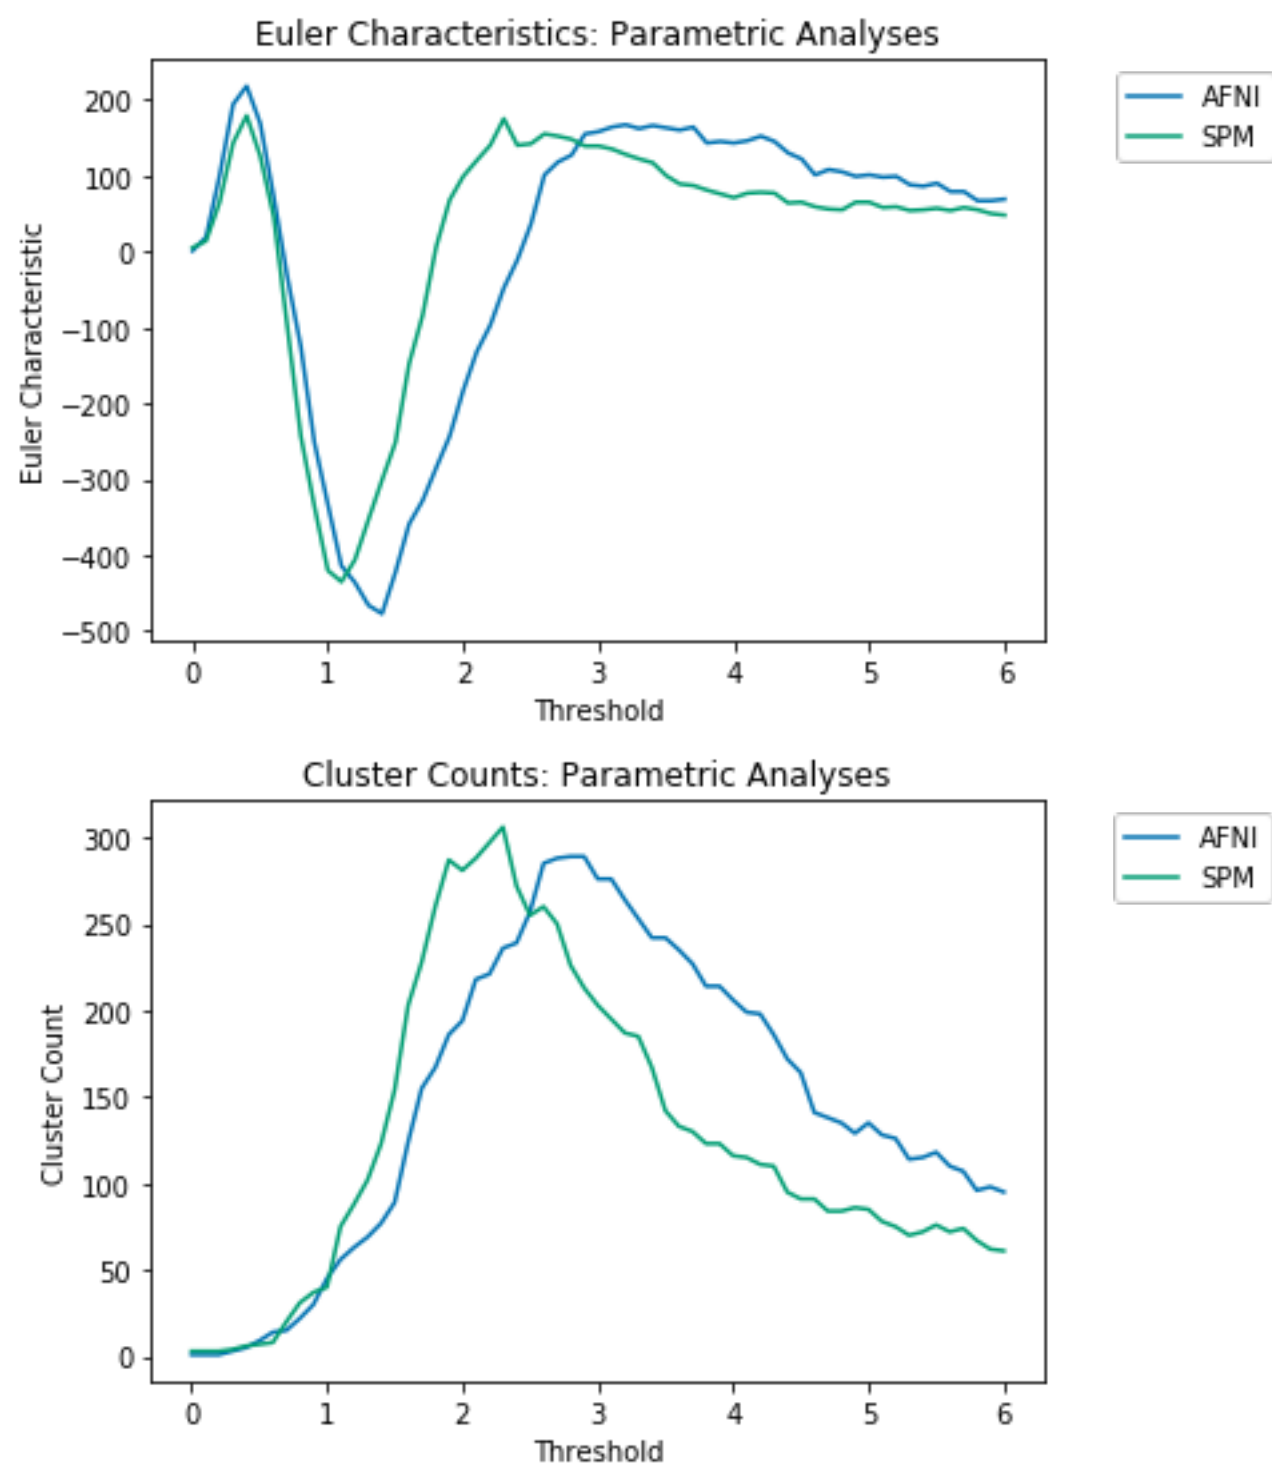

Figure S13. Bland-Altman Percent BOLD Comparisons

Bland-Altman Plots: Percent BOLD Comparisons

ds000001

ds000109

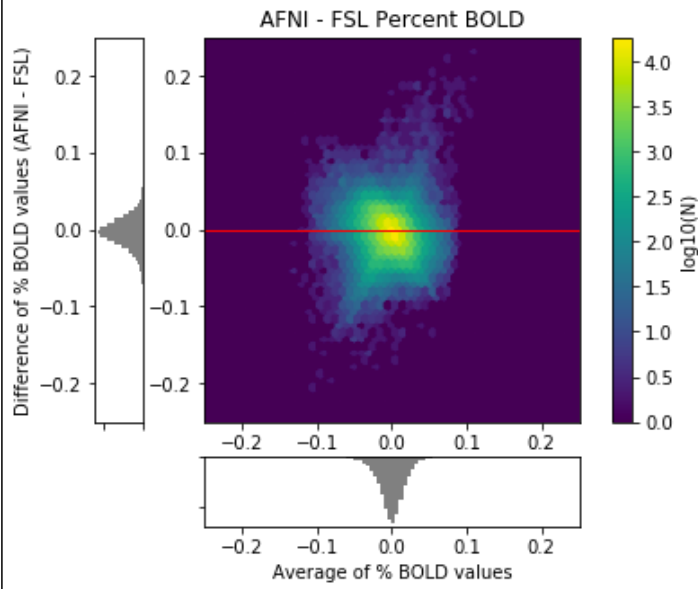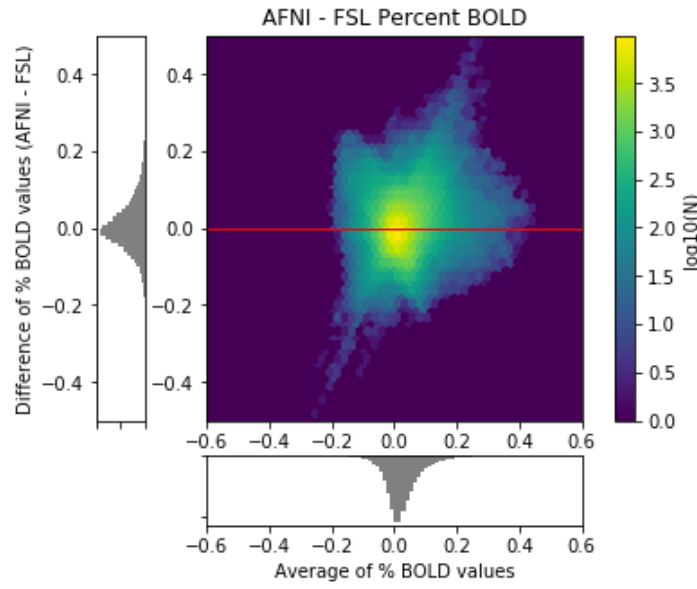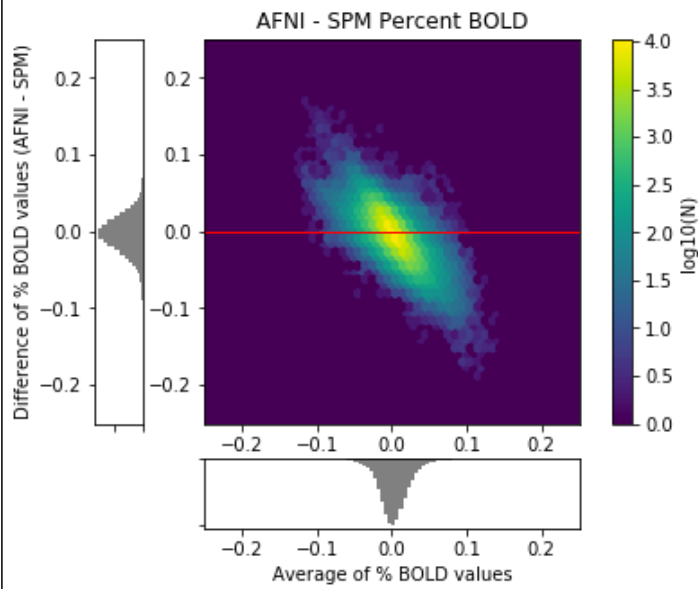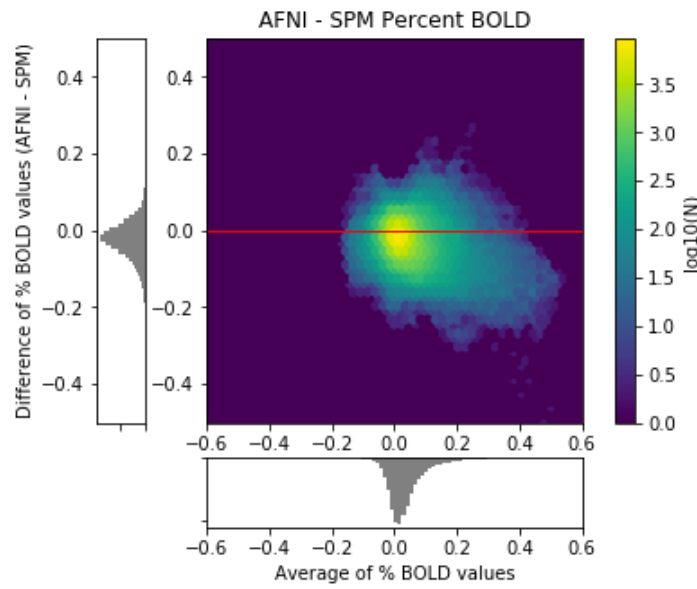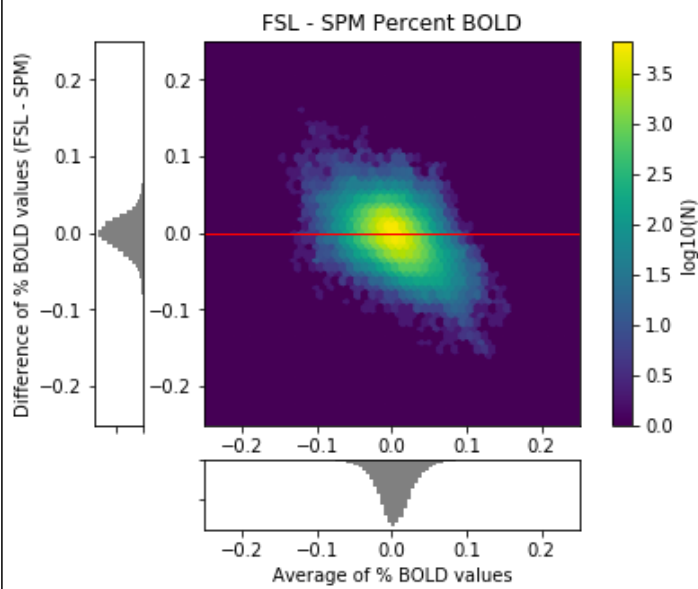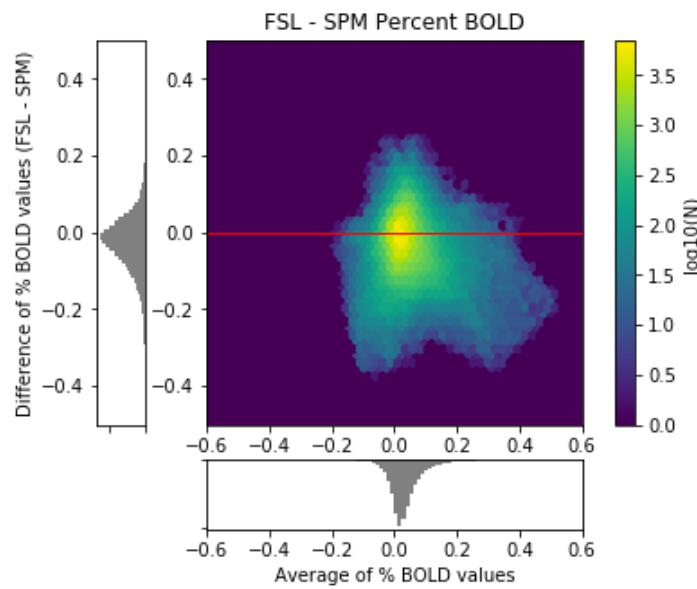

Figure S14. ds000120 R<sup>2</sup> Comparisons

Bland-Altman Plots: Parametric Analyses

ds000120

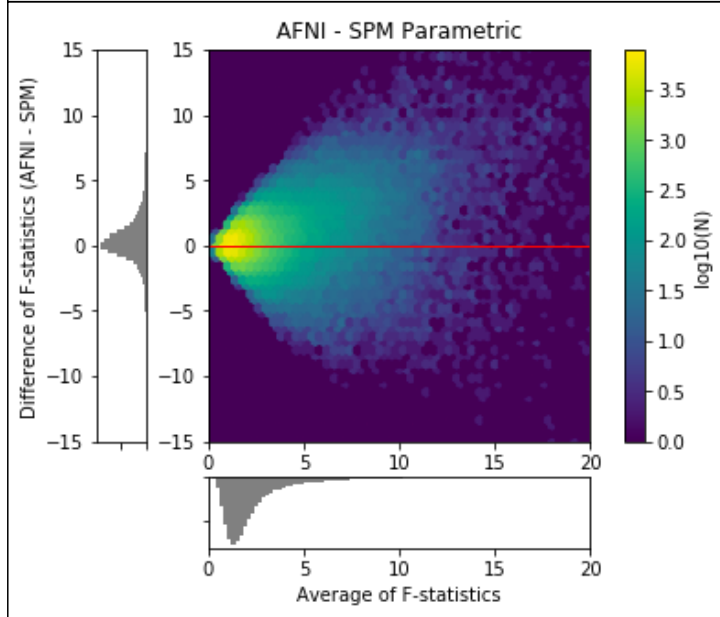

Supplement: Supplementary file [file 285585-2.pdf]
